# Supplementary material for: Genetic diversity of the Thao people of Taiwan using Y-chromosome, mitochondrial DNA and HLA gene systems
Source: BMC Evol Biol. 2019 Feb 27;19:64. doi: 10.1186/s12862-019-1389-0 (PMC6391829; doi:10.1186/s12862-019-1389-0)
Supplement: Supplementary file 7 — Table S5. F4b phylogenetic tree. (XLS 494 kb) [file 12862_2019_1389_MOESM7_ESM.xls]

## Sheet: Sheet5
1	1	0	0	-1	1	-1.64215	1.69963	-8.73709	8.73709	-0.628997	0.708146	-3.3466	3.3466	0	0
		0.164799	0.128049	1	1	-3.96667	3.00665	8.73709	8.73709	-1.51937	1.25271	3.3466	3.3466	0.164799	0.128049
		0	0	1	-1	-5.33851	4.4854	8.73709	-8.73709	-2.04483	1.86882	3.3466	-3.3466	0	0
		0.166031	-0.0967316	-1	-1	-2.89102	1.62579	-8.73709	-8.73709	-1.10736	0.677381	-3.3466	-3.3466	0.166031	-0.0967316
		0	0			-3.91069	2.9007			-1.49793	1.20857			0	0
		-0.265274	0.329195			-2.7297	1.30219			-1.04557	0.542554			-0.265274	0.329195
		0	0			-0.908249	-0.894635			-0.34789	-0.372746			0	0
		0.385315	0.515965			-0.500884	-0.885227			-0.191855	-0.368826			0.385315	0.515965
		0	0			-1.74194	0.497362			-0.66722	0.207224			0	0
		-0.0152694	0.574759			-1.83416	1.84829			-0.702546	0.770082			-0.0152694	0.574759
		0	0			-0.948367	-0.0298957			-0.363256	-0.0124559			0	0
		0.35497	-0.0691942			-1.85214	-0.125595			-0.709433	-0.0523286			0.35497	-0.0691942
		0	0			-0.39913	-1.28011			-0.15288	-0.533354			0	0
		0.526079	0.350455			-5.07588	3.56725			-1.94423	1.48628			0.526079	0.350455
		0	0			-2.50638	1.06105			-0.960027	0.442084			0	0
		0.607498	0.631427			-2.09502	0.370013			-0.802462	0.154165			0.607498	0.631427
		0	0			-1.77624	0.492945			-0.680361	0.205384			0	0
		0.385315	0.515965			-0.164661	-2.1519			-0.0630708	-0.896583			0.385315	0.515965
		0	0			-0.168529	-2.08929			-0.0645523	-0.870495			0	0
		0.0756842	-0.0386119			-0.896107	-1.54908			-0.343239	-0.645418			0.0756842	-0.0386119
		0	0			-0.127962	-2.16584			-0.0490138	-0.90239			0	0
		0.47217	0.36761			-0.316848	-2.01354			-0.121363	-0.838933			0.47217	0.36761
		0	0			1.16652	-1.85099			0.446817	-0.771208			0	0
		0.606619	0.182068			-0.154688	-2.14792			-0.0592507	-0.894924			0.606619	0.182068
		0	0			0.106461	-1.99372			0.040778	-0.830675			0	0
		0.297567	0.108838			0.960777	-2.851			0.36801	-1.18786			0.297567	0.108838
		0	0			0.0783391	-2.27208			0.0300065	-0.946652			0	0
		-0.489755	0.425537			0.277496	-2.29372			0.10629	-0.955671			-0.489755	0.425537
		0	0			0.275358	-2.26667			0.105471	-0.9444			0	0
		-0.451238	0.375354			0.384977	-2.37238			0.147459	-0.988442			-0.451238	0.375354
		0	0			0.224515	-2.151			0.0859967	-0.896204			0	0
		-0.333589	0.266212			-1.80028	0.496966			-0.689569	0.207059			-0.333589	0.266212
		0	0			-0.365544	-1.61551			-0.140016	-0.673094			0	0
		0.372505	0.187148			0.651574	-1.91642			0.249575	-0.79847			0.372505	0.187148
		0	0			8.32104	5.12634			3.18724	2.13587			0	0
		0.260789	0.310345			2.86049	0.706826			1.09566	0.294496			0.260789	0.310345
		0	0			1.67362	-2.42614			0.641054	-1.01084			0	0
		0.139706	-0.338966			3.99329	2.26884			1.52957	0.945305			0.139706	-0.338966
		0	0			0.63457	-0.509972			0.243062	-0.212478			0	0
		-0.105265	-0.552257			0.282998	-0.391404			0.108398	-0.163077			-0.105265	-0.552257
		0	0			-1.208	0.356062			-0.462705	0.148352			0	0
		0.227137	-0.34115			-0.72649	0.475347			-0.27827	0.198052			0.227137	-0.34115
		0	0			2.32196	-0.20113			0.889391	-0.0838002			0	0
		-0.449822	0.407331			1.76983	-1.19502			0.677903	-0.497901			-0.449822	0.407331
		0	0			0.960662	0.343302			0.367966	0.143036			0	0
		-0.236084	0.182663			1.81106	-0.641473			0.693697	-0.267267			-0.236084	0.182663
		0	0			1.26847	-0.457676			0.485866	-0.190689			0	0
		0.326373	0.0869776			1.78081	-0.311899			0.682112	-0.129951			0.326373	0.0869776
		0	0			0.580874	-1.62285			0.222494	-0.676154			0	0
		0.234959	0.297292			1.00399	-1.16028			0.384564	-0.483426			0.234959	0.297292
		0	0			-0.0468291	-1.29728			-0.0179371	-0.540505			0	0
		-0.376481	0.334301			1.40154	-0.748426			0.536837	-0.311829			-0.376481	0.334301
		0	0			2.77295	-0.651085			1.06213	-0.271272			0	0
		-0.102429	0.149486			1.13598	0.330662			0.435117	0.137769			-0.102429	0.149486
		0	0			5.27047	6.58374			2.01877	2.74309			0	0
		0.0439726	0.01732			4.17668	4.9296			1.59981	2.0539			0.0439726	0.01732
		0	0			-1.62892	3.23429			-0.623932	1.34756			0	0
		-0.419937	0.226575			-0.425315	0.821882			-0.16291	0.342434			-0.419937	0.226575
		0	0											0	0
		-0.3615	0.244358											-0.3615	0.244358
		0	0											0	0
		-0.206124	0.132876											-0.206124	0.132876
		0	0											0	0
		-0.557889	0.380585											-0.557889	0.380585
		0	0											0	0
		-0.0484988	0.00757774											-0.0484988	0.00757774
		0	0											0	0
		-0.288329	0.199263											-0.288329	0.199263
		0	0											0	0
		0.205388	0.15532											0.205388	0.15532
		0	0											0	0
		-0.0843478	0.00987169											-0.0843478	0.00987169
		0	0											0	0
		0.32793	-0.226022											0.32793	-0.226022
		0	0											0	0
		-0.35287	0.347772											-0.35287	0.347772
		0	0											0	0
		-0.534695	0.566705											-0.534695	0.566705
		0	0											0	0
		-0.281509	0.162384											-0.281509	0.162384
		0	0											0	0
		0.0815198	-0.257687											0.0815198	-0.257687
		0	0											0	0
		0.120856	0.10152											0.120856	0.10152
		0	0											0	0
		-0.0219697	0.275015											-0.0219697	0.275015
		0	0											0	0
		0.526079	0.350455											0.526079	0.350455
		0	0											0	0
		0.375214	0.344579											0.375214	0.344579
		0	0											0	0
		0.526079	0.350455											0.526079	0.350455

## Sheet: Sheet8
1	1	0	0	-1	1	-1.71946	1.8796	-8.35874	8.35874	-0.664639	0.788564	-3.23099	3.23099	0	0
		0.16734	0.0766035	1	1	-4.06419	2.95	8.35874	8.35874	-1.57097	1.25357	3.23099	3.23099	0.16734	0.0766035
		0	0	1	-1	-5.44367	4.2341	8.35874	-8.35874	-2.1042	1.77637	3.23099	-3.23099	0	0
		0.184828	-0.154305	-1	-1	-2.94332	1.56128	-8.35874	-8.35874	-1.13771	0.655017	-3.23099	-3.23099	0.184828	-0.154305
		0	0			-4.00079	2.85096			-1.54647	1.19609			0	0
		-0.27347	0.314302			-2.77971	1.28222			-1.07447	0.537939			-0.27347	0.314302
		0	0			-0.9	-0.785301			-0.35577	-0.329464			0	0
		0.376314	0.445914			-0.5	-0.700967			-0.201032	-0.294083			0.376314	0.445914
		0	0			-1.76552	0.409837			-0.682444	0.171942			0	0
		-0.0255416	0.506931			-1.89554	1.82415			-0.732701	0.7653			-0.0255416	0.506931
		0	0			-1.00325	0.223183			-0.387796	0.0936337			0	0
		0.37933	-0.139807			-1.88702	0.00681816			-0.729409	0.00286048			0.37933	-0.139807
		0	0			-0.390795	-1.17439			-0.151058	-0.492703			0	0
		0.502331	0.478053			-5.17596	3.50054			-2.00072	1.46861			0.502331	0.478053
		0	0			-2.55454	1.03331			-0.987434	0.433512			0	0
		0.587412	0.635799			-2.1382	0.467551			-0.826501	0.196156			0.587412	0.635799
		0	0			-1.82133	0.588159			-0.704019	0.246755			0	0
		0.376314	0.445914			-0.146197	-2.07			-0.0565109	-0.843816			0.376314	0.445914
		0	0			-0.153236	-1.94434			-0.0592318	-0.815725			0	0
		0.0839267	-0.066245			-0.895826	-1.42012			-0.346273	-0.595795			0.0839267	-0.066245
		0	0			-0.111292	-2.0165			-0.0430188	-0.846			0	0
		0.467079	0.312649			-0.303102	-1.8734			-0.117161	-0.785965			0.467079	0.312649
		0	0			1.14579	-1.67969			0.442894	-0.704697			0	0
		0.603271	0.204734			-0.138265	-2.00146			-0.0534452	-0.839688			0.603271	0.204734
		0	0			0.139946	-1.92209			0.0540948	-0.806391			0	0
		0.294492	0.0917297			0.966411	-2.53002			0.373557	-1.06144			0.294492	0.0917297
		0	0			0.0905422	-2.08626			0.0349982	-0.875266			0	0
		-0.499932	0.402269			0.295877	-2.10515			0.114368	-0.883191			-0.499932	0.402269
		0	0			0.28792	-2.0546			0.111293	-0.861984			0	0
		-0.459535	0.35998			0.400912	-2.16931			0.154969	-0.91011			-0.459535	0.35998
		0	0			0.234031	-1.97933			0.0904626	-0.830407			0	0
		-0.34119	0.263722			-2.19	0.583392			-0.713412	0.244756			-0.34119	0.263722
		0	0			-0.350692	-1.45818			-0.135557	-0.611764			0	0
		0.358625	0.254559			0.691897	-1.89664			0.267446	-0.795714			0.358625	0.254559
		0	0			8	6.99792			3.07713	2.9359			0	0
		0.24033	0.41101			2.81509	0.79934			1.08815	0.335354			0.24033	0.41101
		0	0			1.74323	-2.34684			0.673828	-0.984589			0	0
		0.15097	-0.319931			3.8177	3.18931			1.47569	1.33804			0.15097	-0.319931
		0	0			0.612453	-0.313705			0.236738	-0.131611			0	0
		-0.101195	-0.499887			0.258384	-0.217099			0.0998758	-0.0910813			-0.101195	-0.499887
		0	0			-1.19643	0.099			-0.462468	0.043601			0	0
		0.222807	-0.27617			-0.729	0.156283			-0.276176	0.0655668			0.222807	-0.27617
		0	0			2.396	-0.639488			0.9248	-0.26829			0	0
		-0.467246	0.444142			2.01882	-1.82135			0.780357	-0.764128			-0.467246	0.444142
		0	0			0.963086	0.190421			0.372272	0.079889			0	0
		-0.241213	0.169005			1.95417	-1.11676			0.755365	-0.468524			-0.241213	0.169005
		0	0			1.37198	-0.827225			0.530327	-0.347053			0	0
		0.347668	-0.0188613			1.81586	-0.410691			0.701903	-0.172301			0.347668	-0.0188613
		0	0			1.05538	-2.3608			0.407947	-0.990446			0	0
		0.227906	0.252898			1.32331	-1.67251			0.511513	-0.701682			0.227906	0.252898
		0	0			-0.0341516	-1.23001			-0.013201	-0.516035			0	0
		-0.383638	0.317492			1.55445	-1.20628			0.600857	-0.506082			-0.383638	0.317492
		0	0			2.78527	-0.720481			1.07662	-0.30227			0	0
		-0.102526	0.134865			1.11848	0.223551			0.43234	0.0937883			-0.102526	0.134865
		0	0			5.15606	5.71584			1.99303	2.39802			0	0
		0.0493756	-0.0105859			4.08792	4.26274			1.58014	1.78838			0.0493756	-0.0105859
		0	0			-1.68828	2.76949			-0.652588	1.16191			0	0
		-0.427935	0.225852			-0.456838	0.850408			-0.176586	0.356779			-0.427935	0.225852
		0	0											0	0
		-0.366535	0.220555											-0.366535	0.220555
		0	0											0	0
		-0.209779	0.128267											-0.209779	0.128267
		0	0											0	0
		-0.566201	0.373267											-0.566201	0.373267
		0	0											0	0
		-0.0507445	0.0193452											-0.0507445	0.0193452
		0	0											0	0
		-0.296553	0.206878											-0.296553	0.206878
		0	0											0	0
		0.213227	0.0793587											0.213227	0.0793587
		0	0											0	0
		-0.0881164	0.0269026											-0.0881164	0.0269026
		0	0											0	0
		0.328924	-0.170384											0.328924	-0.170384
		0	0											0	0
		-0.361468	0.31696											-0.361468	0.31696
		0	0											0	0
		-0.551202	0.545116											-0.551202	0.545116
		0	0											0	0
		-0.286643	0.160503											-0.286643	0.160503
		0	0											0	0
		0.0810586	-0.229926											0.0810586	-0.229926
		0	0											0	0
		0.118297	0.0841367											0.118297	0.0841367
		0	0											0	0
		-0.0351077	0.31947											-0.0351077	0.31947
		0	0											0	0
		0.502331	0.478053											0.502331	0.478053
		0	0											0	0
		0.358961	0.393981											0.358961	0.393981
		0	0											0	0
		0.502331	0.478053											0.502331	0.478053
		0	0											0	0
		0.153448	-0.226318											0.153448	-0.226318

## Sheet: Sheet12
1	1	0	0	-1	1	9.76371	-11.1261	-17.7116	17.7116	4.12907	-5.00126	-7.96152	7.96152	0	0
		0.432803	0.745671	1	1	10.2189	-5.39275	17.7116	17.7116	4.32158	-2.42409	7.96152	7.96152	0.432803	0.745671
		0	0	1	-1	8.24302	-7.32608	17.7116	-17.7116	3.48597	-3.29314	7.96152	-7.96152	0	0
		0.277371	0.282638	-1	-1	4.05363	-2.9083	-17.7116	-17.7116	1.71428	-1.3073	-7.96152	-7.96152	0.277371	0.282638
		0	0			-1.18976	-0.886216			-0.503149	-0.398361			0	0
		0.411771	-0.429001			7.8155	-4.72415			3.30518	-2.12354			0.411771	-0.429001
		0	0			-2.21679	0.226604			-0.937483	0.10186			0	0
		0.328343	-0.300961			2.13683	-3.08707			0.903665	-1.38766			0.328343	-0.300961
		0	0			0.743398	-1.92643			0.314383	-0.865946			0	0
		0.35401	-0.428788			-2.30506	0.186696			-0.974809	0.0839213			0.35401	-0.428788
		0	0			2.43987	-1.43151			1.03182	-0.643475			0	0
		0.639879	-0.555009			1.73516	-1.41834			0.733798	-0.637554			0.639879	-0.555009
		0	0			5.98362	4.16683			2.53047	1.87302			0	0
		0.35401	-0.428788			9.73213	16.8682			4.11572	7.5824			0.35401	-0.428788
		0	0			6.44718	5.79359			2.72651	2.60427			0	0
		0.0337169	-0.0799361			7.56392	9.53099			3.19878	4.28426			0.0337169	-0.0799361
		0	0			-2.6542	0.703515			-1.12246	0.316236			0	0
		-0.123306	0.0172168			-3.0563	0.37631			-1.29251	0.169154			-0.123306	0.0172168
		0	0			-2.52435	0.465937			-1.06755	0.209442			0	0
		0.514754	-0.507449			-2.39959	0.440666			-1.01479	0.198083			0.514754	-0.507449
		0	0			-2.14734	1.1891			-0.90811	0.534509			0	0
		-0.102109	0.00359316			-2.5106	0.521887			-1.06173	0.234592			-0.102109	0.00359316
		0	0			-2.39835	0.136631			-1.01426	0.0614169			0	0
		0.35401	-0.428788			-2.48164	0.423135			-1.04949	0.190203			0.35401	-0.428788
		0	0			-2.10925	0.21645			-0.892003	0.0972959			0	0
		0.166841	0.0690607			-1.38329	0.240145			-0.584994	0.107947			0.166841	0.0690607
		0	0			-2.52325	0.438542			-1.06708	0.197128			0	0
		0.514754	-0.507449			-2.51715	0.501704			-1.0645	0.22552			0.514754	-0.507449
		0	0			-2.3125	0.339813			-0.977955	0.152749			0	0
		0.436497	-0.467383			-2.84764	0.0132279			-1.20427	0.00594605			0.436497	-0.467383
		0	0			-3.10307	0.228095			-1.31229	0.102531			0	0
		0.567861	-0.213045			-2.3138	-0.00364334			-0.978507	-0.00163771			0.567861	-0.213045
		0	0			-2.75495	0.149651			-1.16507	0.0672694			0	0
		0.467297	-0.273886			-2.98037	0.274688			-1.2604	0.123475			0.467297	-0.273886
		0	0			-2.82069	0.129609			-1.19287	0.0582603			0	0
		0.400874	-0.193661			-2.68414	0.118321			-1.13512	0.0531863			0.400874	-0.193661
		0	0			-2.16732	0.451703			-0.91656	0.203044			0	0
		0.571283	-0.278036			-1.96416	-0.537944			-0.830644	-0.241811			0.571283	-0.278036
		0	0			-2.8272	-0.131152			-1.19562	-0.0589538			0	0
		0.415996	-0.349499			-2.41413	-0.0744329			-1.02093	-0.0334582			0.415996	-0.349499
		0	0			-1.59501	-0.41698			-0.674531	-0.187436			0	0
		0.571066	-0.0741903			-2.01752	-0.837099			-0.853211	-0.376283			0.571066	-0.0741903
		0	0			-2.11656	-0.395819			-0.895092	-0.177924			0	0
		0.310043	0.294868			-2.10639	-0.23279			-0.890792	-0.104641			0.310043	0.294868
		0	0			0.541392	-0.524168			0.228955	-0.235618			0	0
		-0.00824469	0.0440794			-2.42851	-0.0668736			-1.02702	-0.0300602			-0.00824469	0.0440794
		0	0			-1.54737	-0.684234			-0.654384	-0.307569			0	0
		0.689495	0.303635											0.689495	0.303635
		0	0											0	0
		-0.0320497	0.163665											-0.0320497	0.163665
		0	0											0	0
		0.467297	-0.273886											0.467297	-0.273886
		0	0											0	0
		0.559033	0.350375											0.559033	0.350375
		0	0											0	0
		0.450285	0.223744											0.450285	0.223744
		0	0											0	0
		0.755263	-0.404991											0.755263	-0.404991
		0	0											0	0
		-0.177463	-0.0105461											-0.177463	-0.0105461
		0	0											0	0
		0.328343	-0.300961											0.328343	-0.300961
		0	0											0	0
		0.212991	-0.154049											0.212991	-0.154049
		0	0											0	0
		-0.205902	0.00780773											-0.205902	0.00780773
		0	0											0	0
		0.548521	0.659732											0.548521	0.659732
		0	0											0	0
		0.0279965	0.0912545											0.0279965	0.0912545
		0	0											0	0
		-0.106776	0.188533											-0.106776	0.188533
		0	0											0	0
		0.0617988	0.19984											0.0617988	0.19984
		0	0											0	0
		-0.217444	0.127587											-0.217444	0.127587
		0	0											0	0
		0.432803	0.745671											0.432803	0.745671
		0	0											0	0
		-0.18854	-0.000512832											-0.18854	-0.000512832
		0	0											0	0
		-0.0959349	0.0734781											-0.0959349	0.0734781
		0	0											0	0
		-0.141524	-0.00980873											-0.141524	-0.00980873
		0	0											0	0
		-0.255219	-0.0274307											-0.255219	-0.0274307
		0	0											0	0
		-0.110973	0.00630535											-0.110973	0.00630535
		0	0											0	0
		0.109689	-0.077518											0.109689	-0.077518
		0	0											0	0
		0.00522458	0.238354											0.00522458	0.238354
		0	0											0	0
		-0.104098	0.013772											-0.104098	0.013772
		0	0											0	0
		0.455671	-0.464383											0.455671	-0.464383
		0	0											0	0
		-0.0141568	-0.0609841											-0.0141568	-0.0609841
		0	0											0	0
		0.229012	-0.147875											0.229012	-0.147875
		0	0											0	0
		0.325226	-0.183834											0.325226	-0.183834
		0	0											0	0
		-0.0940166	-0.0503666											-0.0940166	-0.0503666
		0	0											0	0
		0.109689	-0.077518											0.109689	-0.077518
		0	0											0	0
		-0.117351	0.000996315											-0.117351	0.000996315
		0	0											0	0
		0.156127	-0.22798											0.156127	-0.22798
		0	0											0	0
		-0.157685	0.151518											-0.157685	0.151518
		0	0											0	0
		0.487915	0.697489											0.487915	0.697489
		0	0											0	0
		0.283244	0.467847											0.283244	0.467847
		0	0											0	0
		-0.0159564	0.133719											-0.0159564	0.133719
		0	0											0	0
		-0.176664	0.09924											-0.176664	0.09924
		0	0											0	0
		0.495072	0.609441											0.495072	0.609441
		0	0											0	0
		0.653106	-0.458809											0.653106	-0.458809
		0	0											0	0
		0.193528	-0.115016											0.193528	-0.115016
		0	0											0	0
		-0.221227	-0.0323949											-0.221227	-0.0323949
		0	0											0	0
		0.35401	-0.428788											0.35401	-0.428788
		0	0											0	0
		0.000173896	-0.0591403											0.000173896	-0.0591403
		0	0											0	0
		0.0972739	-0.0958697											0.0972739	-0.0958697
		0	0											0	0
		0.54313	0.0638022											0.54313	0.0638022
		0	0											0	0
		0.401525	-0.233239											0.401525	-0.233239
		0	0											0	0
		0.657867	-0.309653											0.657867	-0.309653
		0	0											0	0
		0.15423	-0.147865											0.15423	-0.147865
		0	0											0	0
		0.624374	0.0108002											0.624374	0.0108002
		0	0											0	0
		0.45751	-0.288253											0.45751	-0.288253
		0	0											0	0
		0.0736406	-0.144757											0.0736406	-0.144757
		0	0											0	0
		0.410115	0.229303											0.410115	0.229303
		0	0											0	0
		-0.0781264	-0.0332372											-0.0781264	-0.0332372
		0	0											0	0
		0.168783	-0.172341											0.168783	-0.172341
		0	0											0	0
		0.277371	0.282638											0.277371	0.282638
		0	0											0	0
		0.432803	0.745671											0.432803	0.745671
		0	0											0	0
		-0.0953419	0.113978											-0.0953419	0.113978
		0	0											0	0
		-0.101616	0.128723											-0.101616	0.128723
		0	0											0	0
		-0.058806	0.0628704											-0.058806	0.0628704
		0	0											0	0
		0.413753	-0.464235											0.413753	-0.464235
		0	0											0	0
		0.104525	0.0617361											0.104525	0.0617361
		0	0											0	0
		-0.157934	0.117767											-0.157934	0.117767
		0	0											0	0
		0.310043	0.294868											0.310043	0.294868
		0	0											0	0
		0.0196296	-0.0202009											0.0196296	-0.0202009
		0	0											0	0
		0.310043	0.294868											0.310043	0.294868
		0	0											0	0
		0.580485	-0.182102											0.580485	-0.182102
		0	0											0	0
		0.182248	0.192089											0.182248	0.192089
		0	0											0	0
		0.109689	-0.077518											0.109689	-0.077518
		0	0											0	0
		0.0486119	-0.184218											0.0486119	-0.184218
		0	0											0	0
		0.119189	-0.129376											0.119189	-0.129376
		0	0											0	0
		0.438062	-0.298831											0.438062	-0.298831
		0	0											0	0
		0.173301	0.142854											0.173301	0.142854
		0	0											0	0
		0.467297	-0.273886											0.467297	-0.273886
		0	0											0	0
		-0.00311842	-0.0765949											-0.00311842	-0.0765949
		0	0											0	0
		0.35401	-0.428788											0.35401	-0.428788
		0	0											0	0
		0.638006	0.444821											0.638006	0.444821
		0	0											0	0
		0.467297	-0.273886											0.467297	-0.273886
		0	0											0	0
		-0.101571	-0.0258788											-0.101571	-0.0258788
		0	0											0	0
		0.00345086	-0.115072											0.00345086	-0.115072
		0	0											0	0
		0.390864	-0.189207											0.390864	-0.189207
		0	0											0	0
		0.0365848	-0.093378											0.0365848	-0.093378
		0	0											0	0
		0.0196349	0.0934728											0.0196349	0.0934728
		0	0											0	0
		0.549243	-0.178588											0.549243	-0.178588
		0	0											0	0
		0.432803	0.745671											0.432803	0.745671
		0	0											0	0
		0.575177	-0.228325											0.575177	-0.228325
		0	0											0	0
		0.372538	-0.215696											0.372538	-0.215696
		0	0											0	0
		0.109881	-0.191749											0.109881	-0.191749
		0	0											0	0
		-0.107277	0.0964682											-0.107277	0.0964682
		0	0											0	0
		0.467297	-0.273886											0.467297	-0.273886
		0	0											0	0
		-0.194327	0.0491289											-0.194327	0.0491289
		0	0											0	0
		0.277371	0.282638											0.277371	0.282638
		0	0											0	0
		0.432803	0.745671											0.432803	0.745671
		0	0											0	0
		0.132763	0.0406704											0.132763	0.0406704
		0	0											0	0
		0.432803	0.745671											0.432803	0.745671
		0	0											0	0
		0.417704	-0.254349											0.417704	-0.254349
		0	0											0	0
		0.354336	0.147943											0.354336	0.147943
		0	0											0	0
		0.338729	-0.287112											0.338729	-0.287112
		0	0											0	0
		-0.10992	-0.00657171											-0.10992	-0.00657171
		0	0											0	0
		0.0337169	-0.0799361											0.0337169	-0.0799361
		0	0											0	0
		0.571134	-0.338774											0.571134	-0.338774
		0	0											0	0
		0.4148	0.183877											0.4148	0.183877
		0	0											0	0
		0.432803	0.745671											0.432803	0.745671
		0	0											0	0
		0.432803	0.745671											0.432803	0.745671
		0	0											0	0
		0.432803	0.745671											0.432803	0.745671
		0	0											0	0
		0.310043	0.294868											0.310043	0.294868
		0	0											0	0
		0.310043	0.294868											0.310043	0.294868
		0	0											0	0
		0.487056	-0.422344											0.487056	-0.422344
		0	0											0	0
		-0.01496	-0.136906											-0.01496	-0.136906
		0	0											0	0
		0.0128111	0.124804											0.0128111	0.124804
		0	0											0	0
		0.357247	0.302837											0.357247	0.302837
		0	0											0	0
		-0.107775	0.0295174											-0.107775	0.0295174
		0	0											0	0
		0.281617	-0.254668											0.281617	-0.254668
		0	0											0	0
		-0.116625	0.21285											-0.116625	0.21285
		0	0											0	0
		0.432803	0.745671											0.432803	0.745671
		0	0											0	0
		0.432803	0.745671											0.432803	0.745671
		0	0											0	0
		0.0196296	-0.0202009											0.0196296	-0.0202009

## Sheet: Sheet15
1	1	0	0	-1	1	10.9775	14.8415	-30.2311	30.2311	4.31338	8.7653	-11.8787	11.8787	0	0
		-0.0754247	-0.0680783	1	1	28.7915	-10.8767	30.2311	30.2311	11.313	-6.42371	11.8787	11.8787	-0.0754247	-0.0680783
		0	0	1	-1	2.33362	6.48293	30.2311	-30.2311	0.916946	3.82878	11.8787	-11.8787	0	0
		0.262833	0.131155	-1	-1	1.54946	7.47734	-30.2311	-30.2311	0.608826	4.41607	-11.8787	-11.8787	0.262833	0.131155
		0	0			-0.901292	-0.0823728			-0.354144	-0.0486489			0	0
		0.636182	0.0352616			6.6855	4.38835			2.62693	2.59173			0.636182	0.0352616
		0	0			5.36381	4.80202			2.1076	2.83604			0	0
		0.469755	0.150827			-2.88693	-1.67416			-1.13436	-0.988749			0.469755	0.150827
		0	0			-2.49738	-1.10998			-0.981293	-0.655545			0	0
		0.159777	0.215			-2.55214	-1.38088			-1.00281	-0.815539			0.159777	0.215
		0	0			-2.56133	-1.34114			-1.00642	-0.792067			0	0
		0.415888	0.506588			-2.72839	-1.63806			-1.07206	-0.967429			0.415888	0.506588
		0	0			-2.68321	-1.63896			-1.05431	-0.96796			0	0
		0.674796	0.493922			-2.29404	-1.06976			-0.901394	-0.631792			0.674796	0.493922
		0	0			-2.54846	-1.37885			-1.00137	-0.814338			0	0
		0.205265	-0.0341932			-2.08052	-1.24161			-0.817496	-0.733287			0.205265	-0.0341932
		0	0			-2.23189	-1.12521			-0.876973	-0.664544			0	0
		-0.176989	-0.15308			-2.67386	-1.33099			-1.05064	-0.786074			-0.176989	-0.15308
		0	0			-2.4574	-1.38849			-0.965583	-0.820035			0	0
		-0.0733065	-0.0865051			-2.46095	-1.93209			-0.966979	-1.14108			-0.0733065	-0.0865051
		0	0			-2.78551	-1.66048			-1.09451	-0.980669			0	0
		-0.100372	-0.0855869			-2.04409	-0.484707			-0.803184	-0.286265			-0.100372	-0.0855869
		0	0			-2.79844	-1.3354			-1.09959	-0.788679			0	0
		-0.0865689	-0.068284			-2.0597	-0.910028			-0.809316	-0.537457			-0.0865689	-0.068284
		0	0			-2.41805	-0.790033			-0.950122	-0.466588			0	0
		-0.0940992	-0.0736006			-2.29856	-0.781791			-0.903172	-0.461721			-0.0940992	-0.0736006
		0	0			-2.53206	-1.52053			-0.994921	-0.898014			0	0
		-0.031152	0.0138722			-1.04579	0.309835			-0.410923	0.182987			-0.031152	0.0138722
		0	0			-2.50816	-1.17914			-0.985531	-0.696395			0	0
		0.857639	-0.48698			-1.65323	-0.430623			-0.649603	-0.254324			0.857639	-0.48698
		0	0											0	0
		-0.0683345	-0.047896											-0.0683345	-0.047896
		0	0											0	0
		-0.100397	-0.0591633											-0.100397	-0.0591633
		0	0											0	0
		0.409139	0.462844											0.409139	0.462844
		0	0											0	0
		0.857639	-0.48698											0.857639	-0.48698
		0	0											0	0
		-0.0622821	-0.0573871											-0.0622821	-0.0573871
		0	0											0	0
		0.259253	0.289876											0.259253	0.289876
		0	0											0	0
		0.578372	0.632168											0.578372	0.632168
		0	0											0	0
		0.754543	0.295055											0.754543	0.295055
		0	0											0	0
		0.384237	0.451399											0.384237	0.451399
		0	0											0	0
		-0.168296	-0.118626											-0.168296	-0.118626
		0	0											0	0
		0.0803298	0.218268											0.0803298	0.218268
		0	0											0	0
		0.857639	-0.48698											0.857639	-0.48698
		0	0											0	0
		-0.188667	-0.124899											-0.188667	-0.124899
		0	0											0	0
		-0.0765268	-0.0376714											-0.0765268	-0.0376714
		0	0											0	0
		0.815825	0.384173											0.815825	0.384173
		0	0											0	0
		0.857639	-0.48698											0.857639	-0.48698
		0	0											0	0
		0.302474	-0.0838367											0.302474	-0.0838367
		0	0											0	0
		0.454427	0.434342											0.454427	0.434342
		0	0											0	0
		-0.0492463	-0.0192802											-0.0492463	-0.0192802
		0	0											0	0
		0.00952651	-0.119192											0.00952651	-0.119192
		0	0											0	0
		-0.0576394	0.0184557											-0.0576394	0.0184557
		0	0											0	0
		-0.089783	-0.0713961											-0.089783	-0.0713961
		0	0											0	0
		-0.0684693	-0.035003											-0.0684693	-0.035003
		0	0											0	0
		-0.152076	-0.0904814											-0.152076	-0.0904814
		0	0											0	0
		-0.0185808	-0.0698703											-0.0185808	-0.0698703
		0	0											0	0
		0.857639	-0.48698											0.857639	-0.48698
		0	0											0	0
		0.46798	0.246267											0.46798	0.246267
		0	0											0	0
		-0.0860414	-0.0921908											-0.0860414	-0.0921908
		0	0											0	0
		0.225759	0.0432899											0.225759	0.0432899
		0	0											0	0
		-0.0867837	-0.0824627											-0.0867837	-0.0824627
		0	0											0	0
		-0.0754247	-0.0680783											-0.0754247	-0.0680783
		0	0											0	0
		0.880831	-0.257312											0.880831	-0.257312
		0	0											0	0
		0.857639	-0.48698											0.857639	-0.48698
		0	0											0	0
		0.045462	0.0888772											0.045462	0.0888772
		0	0											0	0
		0.880831	-0.257312											0.880831	-0.257312
		0	0											0	0
		0.816317	-0.151455											0.816317	-0.151455
		0	0											0	0
		0.0614471	0.151425											0.0614471	0.151425
		0	0											0	0
		0.0828974	0.13029											0.0828974	0.13029
		0	0											0	0
		0.857639	-0.48698											0.857639	-0.48698
		0	0											0	0
		0.596299	0.536252											0.596299	0.536252
		0	0											0	0
		0.294172	0.189041											0.294172	0.189041
		0	0											0	0
		0.857639	-0.48698											0.857639	-0.48698
		0	0											0	0
		0.186237	0.492011											0.186237	0.492011
		0	0											0	0
		0.345248	0.179283											0.345248	0.179283
		0	0											0	0
		0.857639	-0.48698											0.857639	-0.48698
		0	0											0	0
		0.639678	0.509861											0.639678	0.509861
		0	0											0	0
		0.206755	0.00868435											0.206755	0.00868435
		0	0											0	0
		0.0634985	0.357518											0.0634985	0.357518
		0	0											0	0
		0.00951812	-0.0422926											0.00951812	-0.0422926
		0	0											0	0
		0.668453	0.389733											0.668453	0.389733
		0	0											0	0
		0.86041	0.323281											0.86041	0.323281
		0	0											0	0
		0.0634985	0.357518											0.0634985	0.357518
		0	0											0	0
		0.0634985	0.357518											0.0634985	0.357518
		0	0											0	0
		0.505447	0.549757											0.505447	0.549757
		0	0											0	0
		0.396139	0.616922											0.396139	0.616922
		0	0											0	0
		0.747601	-0.0702191											0.747601	-0.0702191
		0	0											0	0
		0.27085	0.328795											0.27085	0.328795
		0	0											0	0
		0.578372	0.632168											0.578372	0.632168
		0	0											0	0
		0.857639	-0.48698											0.857639	-0.48698
		0	0											0	0
		0.857639	-0.48698											0.857639	-0.48698
		0	0											0	0
		-0.0315951	0.00274073											-0.0315951	0.00274073
		0	0											0	0
		0.894676	0.0178979											0.894676	0.0178979
		0	0											0	0
		-0.112647	-0.106019											-0.112647	-0.106019
		0	0											0	0
		0.636182	0.0352616											0.636182	0.0352616
		0	0											0	0
		0.857639	-0.48698											0.857639	-0.48698
		0	0											0	0
		0.923152	0.17341											0.923152	0.17341
		0	0											0	0
		-0.0687958	0.0922009											-0.0687958	0.0922009
		0	0											0	0
		0.857639	-0.48698											0.857639	-0.48698
		0	0											0	0
		-0.109499	-0.0956623											-0.109499	-0.0956623
		0	0											0	0
		0.259253	0.289876											0.259253	0.289876
		0	0											0	0
		-0.0294388	-0.0741179											-0.0294388	-0.0741179
		0	0											0	0
		-0.119668	-0.0688178											-0.119668	-0.0688178
		0	0											0	0
		-0.0991507	-0.0868818											-0.0991507	-0.0868818
		0	0											0	0
		-0.112705	-0.0848793											-0.112705	-0.0848793
		0	0											0	0
		-0.105134	-0.0816876											-0.105134	-0.0816876
		0	0											0	0
		-0.0943792	-0.0682277											-0.0943792	-0.0682277
		0	0											0	0
		-0.110267	-0.0665964											-0.110267	-0.0665964
		0	0											0	0
		-0.0610974	0.130991											-0.0610974	0.130991
		0	0											0	0
		-0.0733065	-0.0865051											-0.0733065	-0.0865051
		0	0											0	0
		-0.0228548	0.0567955											-0.0228548	0.0567955
		0	0											0	0
		-0.0838915	-0.0749372											-0.0838915	-0.0749372
		0	0											0	0
		0.505447	0.549757											0.505447	0.549757
		0	0											0	0
		-0.00507506	0.0501273											-0.00507506	0.0501273
		0	0											0	0
		0.164773	0.161753											0.164773	0.161753
		0	0											0	0
		0.349639	0.468889											0.349639	0.468889
		0	0											0	0
		-0.126036	-0.0514616											-0.126036	-0.0514616
		0	0											0	0
		-0.0642747	-0.0602004											-0.0642747	-0.0602004
		0	0											0	0
		0.326293	0.359455											0.326293	0.359455
		0	0											0	0
		-0.0891926	-0.0757842											-0.0891926	-0.0757842
		0	0											0	0
		-0.0812729	-0.0733406											-0.0812729	-0.0733406
		0	0											0	0
		-0.0812729	-0.0733406											-0.0812729	-0.0733406
		0	0											0	0
		-0.111065	-0.0766287											-0.111065	-0.0766287
		0	0											0	0
		0.981852	-0.0611232											0.981852	-0.0611232
		0	0											0	0
		0.182358	0.00619466											0.182358	0.00619466
		0	0											0	0
		-0.159462	-0.0905598											-0.159462	-0.0905598
		0	0											0	0
		0.00333964	-0.0491504											0.00333964	-0.0491504
		0	0											0	0
		0.0414659	-0.108251											0.0414659	-0.108251
		0	0											0	0
		0.284391	0.0804845											0.284391	0.0804845
		0	0											0	0
		0.600974	0.410152											0.600974	0.410152
		0	0											0	0
		0.765352	0.141615											0.765352	0.141615
		0	0											0	0
		0.585834	0.485031											0.585834	0.485031
		0	0											0	0
		0.857639	-0.48698											0.857639	-0.48698
		0	0											0	0
		0.0711477	0.249047											0.0711477	0.249047
		0	0											0	0
		0.141633	0.28276											0.141633	0.28276
		0	0											0	0
		-0.0765268	-0.0376714											-0.0765268	-0.0376714
		0	0											0	0
		0.184341	-0.189211											0.184341	-0.189211
		0	0											0	0
		-0.101669	-0.102799											-0.101669	-0.102799
		0	0											0	0
		-0.143263	-0.125739											-0.143263	-0.125739
		0	0											0	0
		0.141899	0.171726											0.141899	0.171726
		0	0											0	0
		0.401097	0.668781											0.401097	0.668781
		0	0											0	0
		-0.031152	0.0138722											-0.031152	0.0138722
		0	0											0	0
		-0.151553	-0.122869											-0.151553	-0.122869
		0	0											0	0
		-0.031152	0.0138722											-0.031152	0.0138722
		0	0											0	0
		0.857639	-0.48698											0.857639	-0.48698
		0	0											0	0
		0.00863142	-0.0929584											0.00863142	-0.0929584
		0	0											0	0
		0.0558569	0.365769											0.0558569	0.365769
		0	0											0	0
		0.144575	0.31114											0.144575	0.31114
		0	0											0	0
		0.375565	0.533967											0.375565	0.533967
		0	0											0	0
		-0.031152	0.0138722											-0.031152	0.0138722
		0	0											0	0
		0.857639	-0.48698											0.857639	-0.48698
		0	0											0	0
		-0.00640336	-0.0774612											-0.00640336	-0.0774612
		0	0											0	0
		0.326996	0.664495											0.326996	0.664495
		0	0											0	0
		0.857639	-0.48698											0.857639	-0.48698
		0	0											0	0
		0.0212681	0.165701											0.0212681	0.165701
		0	0											0	0
		0.53768	0.636797											0.53768	0.636797
		0	0											0	0
		0.350881	-0.31343											0.350881	-0.31343
		0	0											0	0
		0.0162082	-0.00806214											0.0162082	-0.00806214
		0	0											0	0
		0.330276	0.232481											0.330276	0.232481
		0	0											0	0
		0.434319	0.197465											0.434319	0.197465
		0	0											0	0
		0.310635	0.40578											0.310635	0.40578
		0	0											0	0
		0.107799	0.36892											0.107799	0.36892
		0	0											0	0
		-0.125789	-0.112757											-0.125789	-0.112757
		0	0											0	0
		-0.110353	-0.0685157											-0.110353	-0.0685157
		0	0											0	0
		0.0868416	0.382081											0.0868416	0.382081
		0	0											0	0
		0.857639	-0.48698											0.857639	-0.48698
		0	0											0	0
		0.293103	0.0449143											0.293103	0.0449143
		0	0											0	0
		-0.0901109	-0.0632136											-0.0901109	-0.0632136
		0	0											0	0
		0.0634985	0.357518											0.0634985	0.357518
		0	0											0	0
		0.421423	0.385968											0.421423	0.385968
		0	0											0	0
		0.857639	-0.48698											0.857639	-0.48698
		0	0											0	0
		0.470973	0.685911											0.470973	0.685911
		0	0											0	0
		0.0832112	0.444096											0.0832112	0.444096
		0	0											0	0
		-0.0782345	-0.0606603											-0.0782345	-0.0606603
		0	0											0	0
		0.212658	0.189819											0.212658	0.189819
		0	0											0	0
		-0.0859955	-0.0749569											-0.0859955	-0.0749569
		0	0											0	0
		0.233495	0.416061											0.233495	0.416061
		0	0											0	0
		-0.101358	0.0878335											-0.101358	0.0878335
		0	0											0	0
		-0.031152	0.0138722											-0.031152	0.0138722
		0	0											0	0
		0.857639	-0.48698											0.857639	-0.48698
		0	0											0	0
		0.495564	0.334693											0.495564	0.334693
		0	0											0	0
		0.857639	-0.48698											0.857639	-0.48698
		0	0											0	0
		0.704556	0.430967											0.704556	0.430967
		0	0											0	0
		0.636182	0.0352616											0.636182	0.0352616
		0	0											0	0
		0.923152	0.17341											0.923152	0.17341
		0	0											0	0
		0.505447	0.549757											0.505447	0.549757
		0	0											0	0
		-0.0747129	-0.0527936											-0.0747129	-0.0527936
		0	0											0	0
		0.760525	0.406435											0.760525	0.406435
		0	0											0	0
		0.908461	-0.355048											0.908461	-0.355048
		0	0											0	0
		0.857639	-0.48698											0.857639	-0.48698
		0	0											0	0
		-0.0888408	-0.0372152											-0.0888408	-0.0372152
		0	0											0	0
		0.857639	-0.48698											0.857639	-0.48698
		0	0											0	0
		0.233251	0.0720596											0.233251	0.0720596
		0	0											0	0
		0.838294	0.339434											0.838294	0.339434
		0	0											0	0
		-0.0743916	-0.0496967											-0.0743916	-0.0496967
		0	0											0	0
		0.505447	0.549757											0.505447	0.549757

## Sheet: Sheet18
1	1	0	0	-1	1	10.9775	14.855	-30.2311	30.2311	4.31338	8.7653	-11.8787	11.8787	0	0
		-0.0754247	-0.0680783	1	1	28.7915	-10.8767	30.2311	30.2311	11.313	-6.42371	11.8787	11.8787	-0.0754247	-0.0680783
		0	0	1	-1	2.33362	6.48293	30.2311	-30.2311	0.916946	3.82878	11.8787	-11.8787	0	0
		0.262833	0.131155	-1	-1	1.4	7.47734	-30.2311	-30.2311	0.608826	4.41607	-11.8787	-11.8787	0.262833	0.131155
		0	0			-0.901292	-0.0823728			-0.354144	-0.0486489			0	0
		0.636182	0.0352616			6.6855	4.381			2.62693	2.59173			0.636182	0.0352616
		0	0			5.36381	4.80202			2.1076	2.83604			0	0
		0.469755	0.150827			-2.88693	-1.67416			-1.13436	-0.988749			0.469755	0.150827
		0	0			-2.49738	-1.10998			-0.981293	-0.655545			0	0
		0.159777	0.215			-2.55214	-1.38088			-1.00281	-0.815539			0.159777	0.215
		0	0			-2.56133	-1.34114			-1.00642	-0.792067			0	0
		0.415888	0.506588			-2.72839	-1.63806			-1.07206	-0.967429			0.415888	0.506588
		0	0			-2.68321	-1.63896			-1.05431	-0.96796			0	0
		0.674796	0.493922			-2.29404	-1.06976			-0.901394	-0.631792			0.674796	0.493922
		0	0			-2.54846	-1.37885			-1.00137	-0.814338			0	0
		0.205265	-0.0341932			-2.08052	-1.24161			-0.817496	-0.733287			0.205265	-0.0341932
		0	0			-2.23189	-1.12521			-0.876973	-0.664544			0	0
		-0.176989	-0.15308			-2.67386	-1.33099			-1.05064	-0.786074			-0.176989	-0.15308
		0	0			-2.4574	-1.38849			-0.965583	-0.820035			0	0
		-0.0733065	-0.0865051			-2.46095	-1.93209			-0.966979	-1.14108			-0.0733065	-0.0865051
		0	0			-2.78551	-1.66048			-1.09451	-0.980669			0	0
		-0.100372	-0.0855869			-2.04409	-0.484707			-0.803184	-0.286265			-0.100372	-0.0855869
		0	0			-2.79844	-1.3354			-1.09959	-0.788679			0	0
		-0.0865689	-0.068284			-2.0597	-0.910028			-0.809316	-0.537457			-0.0865689	-0.068284
		0	0			-2.41805	-0.790033			-0.950122	-0.466588			0	0
		-0.0940992	-0.0736006			-3.73	-0.781791			-0.903172	-0.461721			-0.0940992	-0.0736006
		0	0			-2.53206	-1.52053			-0.994921	-0.898014			0	0
		-0.031152	0.0138722			-1.04579	0.309835			-0.410923	0.182987			-0.031152	0.0138722
		0	0			-2.50816	-1.17914			-0.985531	-0.696395			0	0
		0.857639	-0.48698			-1.65323	-0.430623			-0.649603	-0.254324			0.857639	-0.48698
		0	0											0	0
		-0.0683345	-0.047896											-0.0683345	-0.047896
		0	0											0	0
		-0.100397	-0.0591633											-0.100397	-0.0591633
		0	0											0	0
		0.409139	0.462844											0.409139	0.462844
		0	0											0	0
		0.857639	-0.48698											0.857639	-0.48698
		0	0											0	0
		-0.0622821	-0.0573871											-0.0622821	-0.0573871
		0	0											0	0
		0.259253	0.289876											0.259253	0.289876
		0	0											0	0
		0.578372	0.632168											0.578372	0.632168
		0	0											0	0
		0.754543	0.295055											0.754543	0.295055
		0	0											0	0
		0.384237	0.451399											0.384237	0.451399
		0	0											0	0
		-0.168296	-0.118626											-0.168296	-0.118626
		0	0											0	0
		0.0803298	0.218268											0.0803298	0.218268
		0	0											0	0
		0.857639	-0.48698											0.857639	-0.48698
		0	0											0	0
		-0.188667	-0.124899											-0.188667	-0.124899
		0	0											0	0
		-0.0765268	-0.0376714											-0.0765268	-0.0376714
		0	0											0	0
		0.815825	0.384173											0.815825	0.384173
		0	0											0	0
		0.857639	-0.48698											0.857639	-0.48698
		0	0											0	0
		0.302474	-0.0838367											0.302474	-0.0838367
		0	0											0	0
		0.454427	0.434342											0.454427	0.434342
		0	0											0	0
		-0.0492463	-0.0192802											-0.0492463	-0.0192802
		0	0											0	0
		0.00952651	-0.119192											0.00952651	-0.119192
		0	0											0	0
		-0.0576394	0.0184557											-0.0576394	0.0184557
		0	0											0	0
		-0.089783	-0.0713961											-0.089783	-0.0713961
		0	0											0	0
		-0.0684693	-0.035003											-0.0684693	-0.035003
		0	0											0	0
		-0.152076	-0.0904814											-0.152076	-0.0904814
		0	0											0	0
		-0.0185808	-0.0698703											-0.0185808	-0.0698703
		0	0											0	0
		0.857639	-0.48698											0.857639	-0.48698
		0	0											0	0
		0.46798	0.246267											0.46798	0.246267
		0	0											0	0
		-0.0860414	-0.0921908											-0.0860414	-0.0921908
		0	0											0	0
		0.225759	0.0432899											0.225759	0.0432899
		0	0											0	0
		-0.0867837	-0.0824627											-0.0867837	-0.0824627
		0	0											0	0
		-0.0754247	-0.0680783											-0.0754247	-0.0680783
		0	0											0	0
		0.880831	-0.257312											0.880831	-0.257312
		0	0											0	0
		0.857639	-0.48698											0.857639	-0.48698
		0	0											0	0
		0.045462	0.0888772											0.045462	0.0888772
		0	0											0	0
		0.880831	-0.257312											0.880831	-0.257312
		0	0											0	0
		0.816317	-0.151455											0.816317	-0.151455
		0	0											0	0
		0.0614471	0.151425											0.0614471	0.151425
		0	0											0	0
		0.0828974	0.13029											0.0828974	0.13029
		0	0											0	0
		0.857639	-0.48698											0.857639	-0.48698
		0	0											0	0
		0.596299	0.536252											0.596299	0.536252
		0	0											0	0
		0.294172	0.189041											0.294172	0.189041
		0	0											0	0
		0.857639	-0.48698											0.857639	-0.48698
		0	0											0	0
		0.186237	0.492011											0.186237	0.492011
		0	0											0	0
		0.345248	0.179283											0.345248	0.179283
		0	0											0	0
		0.857639	-0.48698											0.857639	-0.48698
		0	0											0	0
		0.639678	0.509861											0.639678	0.509861
		0	0											0	0
		0.206755	0.00868435											0.206755	0.00868435
		0	0											0	0
		0.0634985	0.357518											0.0634985	0.357518
		0	0											0	0
		0.00951812	-0.0422926											0.00951812	-0.0422926
		0	0											0	0
		0.668453	0.389733											0.668453	0.389733
		0	0											0	0
		0.86041	0.323281											0.86041	0.323281
		0	0											0	0
		0.0634985	0.357518											0.0634985	0.357518
		0	0											0	0
		0.0634985	0.357518											0.0634985	0.357518
		0	0											0	0
		0.505447	0.549757											0.505447	0.549757
		0	0											0	0
		0.396139	0.616922											0.396139	0.616922
		0	0											0	0
		0.747601	-0.0702191											0.747601	-0.0702191
		0	0											0	0
		0.27085	0.328795											0.27085	0.328795
		0	0											0	0
		0.578372	0.632168											0.578372	0.632168
		0	0											0	0
		0.857639	-0.48698											0.857639	-0.48698
		0	0											0	0
		0.857639	-0.48698											0.857639	-0.48698
		0	0											0	0
		-0.0315951	0.00274073											-0.0315951	0.00274073
		0	0											0	0
		0.894676	0.0178979											0.894676	0.0178979
		0	0											0	0
		-0.112647	-0.106019											-0.112647	-0.106019
		0	0											0	0
		0.636182	0.0352616											0.636182	0.0352616
		0	0											0	0
		0.857639	-0.48698											0.857639	-0.48698
		0	0											0	0
		0.923152	0.17341											0.923152	0.17341
		0	0											0	0
		-0.0687958	0.0922009											-0.0687958	0.0922009
		0	0											0	0
		0.857639	-0.48698											0.857639	-0.48698
		0	0											0	0
		-0.109499	-0.0956623											-0.109499	-0.0956623
		0	0											0	0
		0.259253	0.289876											0.259253	0.289876
		0	0											0	0
		-0.0294388	-0.0741179											-0.0294388	-0.0741179
		0	0											0	0
		-0.119668	-0.0688178											-0.119668	-0.0688178
		0	0											0	0
		-0.0991507	-0.0868818											-0.0991507	-0.0868818
		0	0											0	0
		-0.112705	-0.0848793											-0.112705	-0.0848793
		0	0											0	0
		-0.105134	-0.0816876											-0.105134	-0.0816876
		0	0											0	0
		-0.0943792	-0.0682277											-0.0943792	-0.0682277
		0	0											0	0
		-0.110267	-0.0665964											-0.110267	-0.0665964
		0	0											0	0
		-0.0610974	0.130991											-0.0610974	0.130991
		0	0											0	0
		-0.0733065	-0.0865051											-0.0733065	-0.0865051
		0	0											0	0
		-0.0228548	0.0567955											-0.0228548	0.0567955
		0	0											0	0
		-0.0838915	-0.0749372											-0.0838915	-0.0749372
		0	0											0	0
		0.505447	0.549757											0.505447	0.549757
		0	0											0	0
		-0.00507506	0.0501273											-0.00507506	0.0501273
		0	0											0	0
		0.164773	0.161753											0.164773	0.161753
		0	0											0	0
		0.349639	0.468889											0.349639	0.468889
		0	0											0	0
		-0.126036	-0.0514616											-0.126036	-0.0514616
		0	0											0	0
		-0.0642747	-0.0602004											-0.0642747	-0.0602004
		0	0											0	0
		0.326293	0.359455											0.326293	0.359455
		0	0											0	0
		-0.0891926	-0.0757842											-0.0891926	-0.0757842
		0	0											0	0
		-0.0812729	-0.0733406											-0.0812729	-0.0733406
		0	0											0	0
		-0.0812729	-0.0733406											-0.0812729	-0.0733406
		0	0											0	0
		-0.111065	-0.0766287											-0.111065	-0.0766287
		0	0											0	0
		0.981852	-0.0611232											0.981852	-0.0611232
		0	0											0	0
		0.182358	0.00619466											0.182358	0.00619466
		0	0											0	0
		-0.159462	-0.0905598											-0.159462	-0.0905598
		0	0											0	0
		0.00333964	-0.0491504											0.00333964	-0.0491504
		0	0											0	0
		0.0414659	-0.108251											0.0414659	-0.108251
		0	0											0	0
		0.284391	0.0804845											0.284391	0.0804845
		0	0											0	0
		0.600974	0.410152											0.600974	0.410152
		0	0											0	0
		0.765352	0.141615											0.765352	0.141615
		0	0											0	0
		0.585834	0.485031											0.585834	0.485031
		0	0											0	0
		0.857639	-0.48698											0.857639	-0.48698
		0	0											0	0
		0.0711477	0.249047											0.0711477	0.249047
		0	0											0	0
		0.141633	0.28276											0.141633	0.28276
		0	0											0	0
		-0.0765268	-0.0376714											-0.0765268	-0.0376714
		0	0											0	0
		0.184341	-0.189211											0.184341	-0.189211
		0	0											0	0
		-0.101669	-0.102799											-0.101669	-0.102799
		0	0											0	0
		-0.143263	-0.125739											-0.143263	-0.125739
		0	0											0	0
		0.141899	0.171726											0.141899	0.171726
		0	0											0	0
		0.401097	0.668781											0.401097	0.668781
		0	0											0	0
		-0.031152	0.0138722											-0.031152	0.0138722
		0	0											0	0
		-0.151553	-0.122869											-0.151553	-0.122869
		0	0											0	0
		-0.031152	0.0138722											-0.031152	0.0138722
		0	0											0	0
		0.857639	-0.48698											0.857639	-0.48698
		0	0											0	0
		0.00863142	-0.0929584											0.00863142	-0.0929584
		0	0											0	0
		0.0558569	0.365769											0.0558569	0.365769
		0	0											0	0
		0.144575	0.31114											0.144575	0.31114
		0	0											0	0
		0.375565	0.533967											0.375565	0.533967
		0	0											0	0
		-0.031152	0.0138722											-0.031152	0.0138722
		0	0											0	0
		0.857639	-0.48698											0.857639	-0.48698
		0	0											0	0
		-0.00640336	-0.0774612											-0.00640336	-0.0774612
		0	0											0	0
		0.326996	0.664495											0.326996	0.664495
		0	0											0	0
		0.857639	-0.48698											0.857639	-0.48698
		0	0											0	0
		0.0212681	0.165701											0.0212681	0.165701
		0	0											0	0
		0.53768	0.636797											0.53768	0.636797
		0	0											0	0
		0.350881	-0.31343											0.350881	-0.31343
		0	0											0	0
		0.0162082	-0.00806214											0.0162082	-0.00806214
		0	0											0	0
		0.330276	0.232481											0.330276	0.232481
		0	0											0	0
		0.434319	0.197465											0.434319	0.197465
		0	0											0	0
		0.310635	0.40578											0.310635	0.40578
		0	0											0	0
		0.107799	0.36892											0.107799	0.36892
		0	0											0	0
		-0.125789	-0.112757											-0.125789	-0.112757
		0	0											0	0
		-0.110353	-0.0685157											-0.110353	-0.0685157
		0	0											0	0
		0.0868416	0.382081											0.0868416	0.382081
		0	0											0	0
		0.857639	-0.48698											0.857639	-0.48698
		0	0											0	0
		0.293103	0.0449143											0.293103	0.0449143
		0	0											0	0
		-0.0901109	-0.0632136											-0.0901109	-0.0632136
		0	0											0	0
		0.0634985	0.357518											0.0634985	0.357518
		0	0											0	0
		0.421423	0.385968											0.421423	0.385968
		0	0											0	0
		0.857639	-0.48698											0.857639	-0.48698
		0	0											0	0
		0.470973	0.685911											0.470973	0.685911
		0	0											0	0
		0.0832112	0.444096											0.0832112	0.444096
		0	0											0	0
		-0.0782345	-0.0606603											-0.0782345	-0.0606603
		0	0											0	0
		0.212658	0.189819											0.212658	0.189819
		0	0											0	0
		-0.0859955	-0.0749569											-0.0859955	-0.0749569
		0	0											0	0
		0.233495	0.416061											0.233495	0.416061
		0	0											0	0
		-0.101358	0.0878335											-0.101358	0.0878335
		0	0											0	0
		-0.031152	0.0138722											-0.031152	0.0138722
		0	0											0	0
		0.857639	-0.48698											0.857639	-0.48698
		0	0											0	0
		0.495564	0.334693											0.495564	0.334693
		0	0											0	0
		0.857639	-0.48698											0.857639	-0.48698
		0	0											0	0
		0.704556	0.430967											0.704556	0.430967
		0	0											0	0
		0.636182	0.0352616											0.636182	0.0352616
		0	0											0	0
		0.923152	0.17341											0.923152	0.17341
		0	0											0	0
		0.505447	0.549757											0.505447	0.549757
		0	0											0	0
		-0.0747129	-0.0527936											-0.0747129	-0.0527936
		0	0											0	0
		0.760525	0.406435											0.760525	0.406435
		0	0											0	0
		0.908461	-0.355048											0.908461	-0.355048
		0	0											0	0
		0.857639	-0.48698											0.857639	-0.48698
		0	0											0	0
		-0.0888408	-0.0372152											-0.0888408	-0.0372152
		0	0											0	0
		0.857639	-0.48698											0.857639	-0.48698
		0	0											0	0
		0.233251	0.0720596											0.233251	0.0720596
		0	0											0	0
		0.838294	0.339434											0.838294	0.339434
		0	0											0	0
		-0.0743916	-0.0496967											-0.0743916	-0.0496967
		0	0											0	0
		0.505447	0.549757											0.505447	0.549757

## Sheet: Sheet4
1	1	0	0	-1	1	9.30933	10.2084	-27.2178	27.2178	3.83943	6.30654	-11.2254	11.2254	0	0
		0.481074	0.428822	1	1	25.9217	-9.54298	27.2178	27.2178	10.6908	-5.89546	11.2254	11.2254	0.481074	0.428822
		0	0	1	-1	2.54978	11.8024	27.2178	-27.2178	1.0516	7.29126	11.2254	-11.2254	0	0
		0.645068	-0.054407	-1	-1	0.841132	7.3535	-27.2178	-27.2178	0.346906	4.54284	-11.2254	-11.2254	0.645068	-0.054407
		0	0			6.00381	2.06682			2.47614	1.27684			0	0
		0.883516	0.127735			5.62537	3.35519			2.32006	2.07277			0.883516	0.127735
		0	0			-3.79998	-1.91337			-1.56721	-1.18204			0	0
		0.181801	0.162423			-3.40057	-1.26896			-1.40249	-0.783935			0.181801	0.162423
		0	0			-3.52908	-1.68086			-1.45549	-1.0384			0	0
		0.420138	0.6822			-3.3931	-1.43433			-1.39941	-0.886098			0.420138	0.6822
		0	0			-3.61923	-1.76718			-1.49267	-1.09172			0	0
		0.670815	0.580441			-3.60801	-1.76819			-1.48804	-1.09235			0.670815	0.580441
		0	0			-3.33552	-1.23799			-1.37566	-0.764804			0	0
		0.749671	-0.0815875			-3.45962	-1.55727			-1.42684	-0.962052			0.749671	-0.0815875
		0	0			-3.18633	-1.58833			-1.31413	-0.981237			0	0
		-0.19392	-0.174002			-3.2457	-1.48602			-1.33861	-0.918035			-0.19392	-0.174002
		0	0			-3.62393	-1.63605			-1.49461	-1.01072			0	0
		-0.105036	-0.12367			-3.50683	-1.89599			-1.44631	-1.17131			-0.105036	-0.12367
		0	0			-3.25009	-2.55467			-1.34043	-1.57822			0	0
		-0.153285	-0.117576			-3.6315	-1.82453			-1.49773	-1.12716			-0.153285	-0.117576
		0	0			-1.66166	-1.62956			-0.685315	-1.00671			0	0
		-0.140563	-0.127948											-0.140563	-0.127948
		0	0											0	0
		-0.139375	-0.0999579											-0.139375	-0.0999579
		0	0											0	0
		0.837738	-0.46197											0.837738	-0.46197
		0	0											0	0
		-0.107797	-0.0599304											-0.107797	-0.0599304
		0	0											0	0
		-0.17912	-0.112305											-0.17912	-0.112305
		0	0											0	0
		0.383704	0.421466											0.383704	0.421466
		0	0											0	0
		0.837738	-0.46197											0.837738	-0.46197
		0	0											0	0
		-0.138122	-0.110239											-0.138122	-0.110239
		0	0											0	0
		0.270187	0.180459											0.270187	0.180459
		0	0											0	0
		0.561381	0.44184											0.561381	0.44184
		0	0											0	0
		0.726597	0.165223											0.726597	0.165223
		0	0											0	0
		0.441763	0.348363											0.441763	0.348363
		0	0											0	0
		-0.21342	-0.148625											-0.21342	-0.148625
		0	0											0	0
		0.0412879	0.134753											0.0412879	0.134753
		0	0											0	0
		0.837738	-0.46197											0.837738	-0.46197
		0	0											0	0
		-0.125587	-0.120478											-0.125587	-0.120478
		0	0											0	0
		-0.0537015	-0.0788859											-0.0537015	-0.0788859
		0	0											0	0
		0.80141	0.223816											0.80141	0.223816
		0	0											0	0
		0.837738	-0.46197											0.837738	-0.46197
		0	0											0	0
		0.880055	-0.301283											0.880055	-0.301283
		0	0											0	0
		0.535739	0.427214											0.535739	0.427214
		0	0											0	0
		-0.0428758	-0.146019											-0.0428758	-0.146019
		0	0											0	0
		0.16117	0.216877											0.16117	0.216877
		0	0											0	0
		0.127305	-0.215897											0.127305	-0.215897
		0	0											0	0
		-0.0537015	-0.0788859											-0.0537015	-0.0788859
		0	0											0	0
		-0.21272	-0.103019											-0.21272	-0.103019
		0	0											0	0
		-0.0840479	-0.126843											-0.0840479	-0.126843
		0	0											0	0
		0.837738	-0.46197											0.837738	-0.46197
		0	0											0	0
		0.474225	0.491063											0.474225	0.491063
		0	0											0	0
		-0.124058	-0.140881											-0.124058	-0.140881
		0	0											0	0
		0.560656	-0.00899162											0.560656	-0.00899162
		0	0											0	0
		0.242898	-0.191869											0.242898	-0.191869
		0	0											0	0
		0.880055	-0.301283											0.880055	-0.301283
		0	0											0	0
		0.837738	-0.46197											0.837738	-0.46197
		0	0											0	0
		0.336024	0.641178											0.336024	0.641178
		0	0											0	0
		0.880055	-0.301283											0.880055	-0.301283
		0	0											0	0
		0.820786	-0.215508											0.820786	-0.215508
		0	0											0	0
		0.241891	0.632198											0.241891	0.632198
		0	0											0	0
		0.204436	0.283818											0.204436	0.283818
		0	0											0	0
		0.837738	-0.46197											0.837738	-0.46197
		0	0											0	0
		0.605218	0.618601											0.605218	0.618601
		0	0											0	0
		0.727647	0.543294											0.727647	0.543294
		0	0											0	0
		0.837738	-0.46197											0.837738	-0.46197
		0	0											0	0
		0.196173	0.714488											0.196173	0.714488
		0	0											0	0
		0.805099	0.240013											0.805099	0.240013
		0	0											0	0
		0.837738	-0.46197											0.837738	-0.46197
		0	0											0	0
		0.639787	0.33107											0.639787	0.33107
		0	0											0	0
		0.946642	-0.0351451											0.946642	-0.0351451
		0	0											0	0
		0.0470535	0.373559											0.0470535	0.373559
		0	0											0	0
		0.900738	-0.37538											0.900738	-0.37538
		0	0											0	0
		0.668983	0.304865											0.668983	0.304865
		0	0											0	0
		0.857115	0.166082											0.857115	0.166082
		0	0											0	0
		0.0470535	0.373559											0.0470535	0.373559
		0	0											0	0
		0.0470535	0.373559											0.0470535	0.373559
		0	0											0	0
		0.477024	0.388759											0.477024	0.388759
		0	0											0	0
		0.395438	0.798164											0.395438	0.798164
		0	0											0	0
		0.754635	-0.146747											0.754635	-0.146747
		0	0											0	0
		0.324763	0.597642											0.324763	0.597642
		0	0											0	0
		0.561381	0.44184											0.561381	0.44184
		0	0											0	0
		0.837738	-0.46197											0.837738	-0.46197
		0	0											0	0
		0.837738	-0.46197											0.837738	-0.46197
		0	0											0	0
		-0.074134	-0.0413736											-0.074134	-0.0413736
		0	0											0	0
		0.869204	-0.0677924											0.869204	-0.0677924
		0	0											0	0
		-0.167644	-0.123801											-0.167644	-0.123801
		0	0											0	0
		0.645068	-0.054407											0.645068	-0.054407
		0	0											0	0
		0.837738	-0.46197											0.837738	-0.46197
		0	0											0	0
		0.90915	0.0461889											0.90915	0.0461889
		0	0											0	0
		-0.127969	0.0827121											-0.127969	0.0827121
		0	0											0	0
		0.837738	-0.46197											0.837738	-0.46197
		0	0											0	0
		-0.117448	-0.142721											-0.117448	-0.142721
		0	0											0	0
		0.270187	0.180459											0.270187	0.180459
		0	0											0	0
		-0.0712625	-0.0945361											-0.0712625	-0.0945361
		0	0											0	0
		-0.179485	-0.0991141											-0.179485	-0.0991141
		0	0											0	0
		-0.140562	-0.104965											-0.140562	-0.104965
		0	0											0	0
		-0.190823	-0.163916											-0.190823	-0.163916
		0	0											0	0
		-0.119971	-0.147639											-0.119971	-0.147639
		0	0											0	0
		-0.100986	-0.132793											-0.100986	-0.132793
		0	0											0	0
		-0.118735	-0.145046											-0.118735	-0.145046
		0	0											0	0
		-0.0651792	0.141434											-0.0651792	0.141434
		0	0											0	0
		-0.105036	-0.12367											-0.105036	-0.12367
		0	0											0	0
		-0.11751	-0.0448542											-0.11751	-0.0448542
		0	0											0	0
		-0.128901	-0.110281											-0.128901	-0.110281
		0	0											0	0
		0.477024	0.388759											0.477024	0.388759
		0	0											0	0
		0.198277	0.539963											0.198277	0.539963
		0	0											0	0
		0.57037	0.524429											0.57037	0.524429
		0	0											0	0
		0.361161	0.568758											0.361161	0.568758
		0	0											0	0
		0.184424	0.084941											0.184424	0.084941
		0	0											0	0
		-0.106529	-0.0971073											-0.106529	-0.0971073
		0	0											0	0
		0.375858	0.608892											0.375858	0.608892
		0	0											0	0
		-0.146791	-0.156973											-0.146791	-0.156973
		0	0											0	0
		-0.116966	-0.0855479											-0.116966	-0.0855479
		0	0											0	0
		-0.116966	-0.0855479											-0.116966	-0.0855479
		0	0											0	0
		-0.160109	-0.125174											-0.160109	-0.125174
		0	0											0	0
		0.972597	-0.148841											0.972597	-0.148841
		0	0											0	0
		0.143748	-0.0563737											0.143748	-0.0563737
		0	0											0	0
		-0.0537015	-0.0788859											-0.0537015	-0.0788859
		0	0											0	0
		0.837738	-0.46197											0.837738	-0.46197
		0	0											0	0
		0.880896	-0.294287											0.880896	-0.294287
		0	0											0	0
		0.541536	0.0198093											0.541536	0.0198093
		0	0											0	0
		0.616087	0.591272											0.616087	0.591272
		0	0											0	0
		0.768514	0.252545											0.768514	0.252545
		0	0											0	0
		0.588531	0.313508											0.588531	0.313508
		0	0											0	0
		0.837738	-0.46197											0.837738	-0.46197
		0	0											0	0
		0.123873	0.564363											0.123873	0.564363
		0	0											0	0
		0.276417	0.664718											0.276417	0.664718
		0	0											0	0
		-0.0537015	-0.0788859											-0.0537015	-0.0788859
		0	0											0	0
		0.406824	-0.318557											0.406824	-0.318557
		0	0											0	0
		-0.137937	-0.116941											-0.137937	-0.116941
		0	0											0	0
		-0.211322	-0.149584											-0.211322	-0.149584
		0	0											0	0
		0.149644	0.0602772											0.149644	0.0602772
		0	0											0	0
		0.376079	0.489748											0.376079	0.489748
		0	0											0	0
		-0.261606	-0.183245											-0.261606	-0.183245
		0	0											0	0
		0.837738	-0.46197											0.837738	-0.46197
		0	0											0	0
		-0.031533	-0.112463											-0.031533	-0.112463
		0	0											0	0
		0.170295	0.808984											0.170295	0.808984
		0	0											0	0
		0.126602	0.329996											0.126602	0.329996
		0	0											0	0
		0.379779	0.709006											0.379779	0.709006
		0	0											0	0
		0.837738	-0.46197											0.837738	-0.46197
		0	0											0	0
		0.635596	-0.420107											0.635596	-0.420107
		0	0											0	0
		0.300859	0.494183											0.300859	0.494183
		0	0											0	0
		0.837738	-0.46197											0.837738	-0.46197
		0	0											0	0
		0.328857	0.781143											0.328857	0.781143
		0	0											0	0
		0.516523	0.450686											0.516523	0.450686
		0	0											0	0
		0.315066	-0.336683											0.315066	-0.336683
		0	0											0	0
		0.589585	-0.0926231											0.589585	-0.0926231
		0	0											0	0
		0.72933	0.316198											0.72933	0.316198
		0	0											0	0
		0.800601	0.413105											0.800601	0.413105
		0	0											0	0
		0.295224	0.614006											0.295224	0.614006
		0	0											0	0
		0.266046	0.67469											0.266046	0.67469
		0	0											0	0
		-0.146873	-0.127511											-0.146873	-0.127511
		0	0											0	0
		-0.185406	-0.102888											-0.185406	-0.102888
		0	0											0	0
		0.0714924	0.38879											0.0714924	0.38879
		0	0											0	0
		0.837738	-0.46197											0.837738	-0.46197
		0	0											0	0
		0.243552	-0.0494973											0.243552	-0.0494973
		0	0											0	0
		-0.0537015	-0.0788859											-0.0537015	-0.0788859
		0	0											0	0
		0.0470535	0.373559											0.0470535	0.373559
		0	0											0	0
		0.378911	0.262153											0.378911	0.262153
		0	0											0	0
		0.837738	-0.46197											0.837738	-0.46197
		0	0											0	0
		0.450399	0.494796											0.450399	0.494796
		0	0											0	0
		0.0895029	0.443906											0.0895029	0.443906
		0	0											0	0
		-0.121891	-0.0847774											-0.121891	-0.0847774
		0	0											0	0
		0.198804	0.0774397											0.198804	0.0774397
		0	0											0	0
		-0.122808	-0.092625											-0.122808	-0.092625
		0	0											0	0
		0.228167	0.406367											0.228167	0.406367
		0	0											0	0
		-0.10493	0.0669931											-0.10493	0.0669931
		0	0											0	0
		0.837738	-0.46197											0.837738	-0.46197
		0	0											0	0
		0.494752	0.390561											0.494752	0.390561
		0	0											0	0
		0.837738	-0.46197											0.837738	-0.46197
		0	0											0	0
		0.709876	0.265033											0.709876	0.265033
		0	0											0	0
		0.645068	-0.054407											0.645068	-0.054407
		0	0											0	0
		0.90915	0.0461889											0.90915	0.0461889
		0	0											0	0
		0.477024	0.388759											0.477024	0.388759
		0	0											0	0
		0.747309	0.316768											0.747309	0.316768
		0	0											0	0
		0.900738	-0.37538											0.900738	-0.37538
		0	0											0	0
		0.837738	-0.46197											0.837738	-0.46197
		0	0											0	0
		-0.0537015	-0.0788859											-0.0537015	-0.0788859
		0	0											0	0
		0.837738	-0.46197											0.837738	-0.46197
		0	0											0	0
		0.755125	0.173049											0.755125	0.173049
		0	0											0	0
		0.840608	0.183488											0.840608	0.183488
		0	0											0	0
		-0.1099	-0.0614294											-0.1099	-0.0614294
		0	0											0	0
		0.477024	0.388759											0.477024	0.388759

## Sheet: Sheet10
1	1	0	0	-1	1	12.4547	17.0169	-27.926	27.926	4.74845	10.6398	-11.1718	11.1718	0	0
		0.845833	-0.276235	1	1	26.5962	-11.1112	27.926	27.926	10.14	-6.94725	11.1718	11.1718	0.845833	-0.276235
		0	0	1	-1	11.6701	4.02352	27.926	-27.926	4.44932	2.5157	11.1718	-11.1718	0	0
		0.811227	-0.21494	-1	-1	-3.84445	-0.885955	-27.926	-27.926	-1.46573	-0.553942	-11.1718	-11.1718	0.811227	-0.21494
		0	0			-3.40049	-0.670096			-1.29646	-0.418977			0	0
		0.955907	0.279624			-3.66081	-0.831896			-1.39571	-0.520142			0.955907	0.279624
		0	0			-3.44703	-0.553943			-1.31421	-0.346352			0	0
		0.350112	0.197958			-3.70635	-0.816202			-1.41307	-0.510329			0.350112	0.197958
		0	0			-3.69861	-0.895448			-1.41013	-0.559878			0	0
		0.751196	0.602998			-3.29464	-0.821881			-1.25611	-0.51388			0.751196	0.602998
		0	0			-3.58467	-0.773987			-1.36668	-0.483934			0	0
		0.902592	0.287489			-3.34279	-0.81511			-1.27446	-0.509647			0.902592	0.287489
		0	0			-3.4023	-0.530981			-1.29715	-0.331995			0	0
		0.805827	0.108869			-3.72709	-0.816349			-1.42098	-0.510421			0.805827	0.108869
		0	0			-3.61219	-0.708031			-1.37718	-0.442695			0	0
		-0.181325	-0.0666233			-3.24851	-0.547221			-1.23852	-0.342149			-0.181325	-0.0666233
		0	0			-3.69168	-0.749805			-1.40748	-0.468815			0	0
		-0.0974579	-0.0269233			-1.05941	0.487619			-0.403908	0.304883			-0.0974579	-0.0269233
		0	0											0	0
		-0.148104	-0.0539232											-0.148104	-0.0539232
		0	0											0	0
		-0.139348	-0.03762											-0.139348	-0.03762
		0	0											0	0
		-0.133135	-0.0467119											-0.133135	-0.0467119
		0	0											0	0
		0.797907	-0.546671											0.797907	-0.546671
		0	0											0	0
		-0.0988416	-0.0404367											-0.0988416	-0.0404367
		0	0											0	0
		-0.18021	-0.0592011											-0.18021	-0.0592011
		0	0											0	0
		0.841196	0.454072											0.841196	0.454072
		0	0											0	0
		0.797907	-0.546671											0.797907	-0.546671
		0	0											0	0
		-0.136353	-0.0686843											-0.136353	-0.0686843
		0	0											0	0
		0.350112	0.197958											0.350112	0.197958
		0	0											0	0
		0.620108	0.749932											0.620108	0.749932
		0	0											0	0
		0.769984	0.413696											0.769984	0.413696
		0	0											0	0
		0.512685	0.694933											0.512685	0.694933
		0	0											0	0
		-0.199674	-0.0154298											-0.199674	-0.0154298
		0	0											0	0
		0.0642099	0.287929											0.0642099	0.287929
		0	0											0	0
		0.797907	-0.546671											0.797907	-0.546671
		0	0											0	0
		-0.110044	-0.0263614											-0.110044	-0.0263614
		0	0											0	0
		-0.0317831	0.0239909											-0.0317831	0.0239909
		0	0											0	0
		0.841196	0.454072											0.841196	0.454072
		0	0											0	0
		0.797907	-0.546671											0.797907	-0.546671
		0	0											0	0
		0.88807	-0.44816											0.88807	-0.44816
		0	0											0	0
		0.893644	0.35734											0.893644	0.35734
		0	0											0	0
		-0.0453363	-0.101377											-0.0453363	-0.101377
		0	0											0	0
		0.150333	0.034822											0.150333	0.034822
		0	0											0	0
		0.141257	-0.115538											0.141257	-0.115538
		0	0											0	0
		-0.0317831	0.0239909											-0.0317831	0.0239909
		0	0											0	0
		-0.201357	-0.0742635											-0.201357	-0.0742635
		0	0											0	0
		-0.0925192	-0.0759881											-0.0925192	-0.0759881
		0	0											0	0
		0.797907	-0.546671											0.797907	-0.546671
		0	0											0	0
		0.88807	-0.44816											0.88807	-0.44816
		0	0											0	0
		-0.116995	-0.030429											-0.116995	-0.030429
		0	0											0	0
		0.620925	0.226505											0.620925	0.226505
		0	0											0	0
		0.240569	-0.113177											0.240569	-0.113177
		0	0											0	0
		0.88807	-0.44816											0.88807	-0.44816
		0	0											0	0
		0.797907	-0.546671											0.797907	-0.546671
		0	0											0	0
		0.995536	0.0398382											0.995536	0.0398382
		0	0											0	0
		0.88807	-0.44816											0.88807	-0.44816
		0	0											0	0
		0.889044	-0.384621											0.889044	-0.384621
		0	0											0	0
		0.71517	0.393097											0.71517	0.393097
		0	0											0	0
		0.889044	-0.384621											0.889044	-0.384621
		0	0											0	0
		0.797907	-0.546671											0.797907	-0.546671
		0	0											0	0
		0.78711	0.491384											0.78711	0.491384
		0	0											0	0
		0.930342	0.0899451											0.930342	0.0899451
		0	0											0	0
		0.797907	-0.546671											0.797907	-0.546671
		0	0											0	0
		0.502976	0.857573											0.502976	0.857573
		0	0											0	0
		0.86648	0.468969											0.86648	0.468969
		0	0											0	0
		0.797907	-0.546671											0.797907	-0.546671
		0	0											0	0
		0.783681	0.595886											0.783681	0.595886
		0	0											0	0
		0.995536	0.0398382											0.995536	0.0398382
		0	0											0	0
		0.350112	0.197958											0.350112	0.197958
		0	0											0	0
		0.867427	-0.494611											0.867427	-0.494611
		0	0											0	0
		0.950102	0.13599											0.950102	0.13599
		0	0											0	0
		0.927912	0.343922											0.927912	0.343922
		0	0											0	0
		0.350112	0.197958											0.350112	0.197958
		0	0											0	0
		0.350112	0.197958											0.350112	0.197958
		0	0											0	0
		0.541361	0.710647											0.541361	0.710647
		0	0											0	0
		0.763464	0.608056											0.763464	0.608056
		0	0											0	0
		0.871086	-0.322028											0.871086	-0.322028
		0	0											0	0
		0.925071	0.200886											0.925071	0.200886
		0	0											0	0
		0.620108	0.749932											0.620108	0.749932
		0	0											0	0
		0.797907	-0.546671											0.797907	-0.546671
		0	0											0	0
		0.797907	-0.546671											0.797907	-0.546671
		0	0											0	0
		-0.060353	0.0271534											-0.060353	0.0271534
		0	0											0	0
		0.886152	0.0775112											0.886152	0.0775112
		0	0											0	0
		-0.15986	-0.0607843											-0.15986	-0.0607843
		0	0											0	0
		0.811227	-0.21494											0.811227	-0.21494
		0	0											0	0
		0.797907	-0.546671											0.797907	-0.546671
		0	0											0	0
		0.926998	0.203868											0.926998	0.203868
		0	0											0	0
		-0.131272	-0.0416995											-0.131272	-0.0416995
		0	0											0	0
		0.797907	-0.546671											0.797907	-0.546671
		0	0											0	0
		-0.104114	-0.0194523											-0.104114	-0.0194523
		0	0											0	0
		0.350112	0.197958											0.350112	0.197958
		0	0											0	0
		-0.0701069	-0.0609454											-0.0701069	-0.0609454
		0	0											0	0
		-0.169735	-0.0670098											-0.169735	-0.0670098
		0	0											0	0
		-0.132856	-0.043834											-0.132856	-0.043834
		0	0											0	0
		-0.197359	-0.0673919											-0.197359	-0.0673919
		0	0											0	0
		-0.104307	-0.0154062											-0.104307	-0.0154062
		0	0											0	0
		-0.0780017	0.00764315											-0.0780017	0.00764315
		0	0											0	0
		-0.104418	-0.0178325											-0.104418	-0.0178325
		0	0											0	0
		-0.0849364	0.00191148											-0.0849364	0.00191148
		0	0											0	0
		-0.0974579	-0.0269233											-0.0974579	-0.0269233
		0	0											0	0
		-0.146888	-0.0393664											-0.146888	-0.0393664
		0	0											0	0
		-0.122965	-0.0388542											-0.122965	-0.0388542
		0	0											0	0
		0.541361	0.710647											0.541361	0.710647
		0	0											0	0
		0.811227	-0.21494											0.811227	-0.21494
		0	0											0	0
		0.66484	0.171775											0.66484	0.171775
		0	0											0	0
		0.886649	0.216204											0.886649	0.216204
		0	0											0	0
		0.203573	0.151619											0.203573	0.151619
		0	0											0	0
		-0.0936824	-0.0369538											-0.0936824	-0.0369538
		0	0											0	0
		0.927912	0.343922											0.927912	0.343922
		0	0											0	0
		-0.157494	-0.0497013											-0.157494	-0.0497013
		0	0											0	0
		-0.111193	-0.0401573											-0.111193	-0.0401573
		0	0											0	0
		-0.111193	-0.0401573											-0.111193	-0.0401573
		0	0											0	0
		-0.156739	-0.0480887											-0.156739	-0.0480887
		0	0											0	0
		0.970774	-0.107305											0.970774	-0.107305
		0	0											0	0
		0.144578	0.0209645											0.144578	0.0209645
		0	0											0	0
		-0.0317831	0.0239909											-0.0317831	0.0239909
		0	0											0	0
		0.797907	-0.546671											0.797907	-0.546671
		0	0											0	0
		0.891359	-0.423061											0.891359	-0.423061
		0	0											0	0
		0.721069	-0.104931											0.721069	-0.104931
		0	0											0	0
		0.983918	-0.0201314											0.983918	-0.0201314
		0	0											0	0
		0.865217	-0.0876008											0.865217	-0.0876008
		0	0											0	0
		0.762762	0.567798											0.762762	0.567798
		0	0											0	0
		0.797907	-0.546671											0.797907	-0.546671
		0	0											0	0
		0.674466	-0.0905468											0.674466	-0.0905468
		0	0											0	0
		0.725164	-0.126131											0.725164	-0.126131
		0	0											0	0
		-0.0317831	0.0239909											-0.0317831	0.0239909
		0	0											0	0
		0.405984	-0.276221											0.405984	-0.276221
		0	0											0	0
		-0.130013	-0.0531377											-0.130013	-0.0531377
		0	0											0	0
		-0.202752	-0.0709528											-0.202752	-0.0709528
		0	0											0	0
		0.137971	0.108245											0.137971	0.108245
		0	0											0	0
		0.440604	0.822926											0.440604	0.822926
		0	0											0	0
		-0.255619	-0.0854972											-0.255619	-0.0854972
		0	0											0	0
		0.797907	-0.546671											0.797907	-0.546671
		0	0											0	0
		-0.0322245	-0.0741056											-0.0322245	-0.0741056
		0	0											0	0
		0.480851	0.844224											0.480851	0.844224
		0	0											0	0
		0.811227	-0.21494											0.811227	-0.21494
		0	0											0	0
		0.690784	0.678068											0.690784	0.678068
		0	0											0	0
		0.797907	-0.546671											0.797907	-0.546671
		0	0											0	0
		0.620615	-0.423776											0.620615	-0.423776
		0	0											0	0
		0.37365	0.837236											0.37365	0.837236
		0	0											0	0
		0.797907	-0.546671											0.797907	-0.546671
		0	0											0	0
		0.500137	0.833319											0.500137	0.833319
		0	0											0	0
		0.572199	0.765054											0.572199	0.765054
		0	0											0	0
		0.303582	-0.292391											0.303582	-0.292391
		0	0											0	0
		0.721069	-0.104931											0.721069	-0.104931
		0	0											0	0
		0.900331	0.303031											0.900331	0.303031
		0	0											0	0
		0.953248	0.201797											0.953248	0.201797
		0	0											0	0
		0.45206	0.0943941											0.45206	0.0943941
		0	0											0	0
		0.38288	0.618938											0.38288	0.618938
		0	0											0	0
		-0.123619	-0.0476815											-0.123619	-0.0476815
		0	0											0	0
		-0.176329	-0.070464											-0.176329	-0.070464
		0	0											0	0
		0.350112	0.197958											0.350112	0.197958
		0	0											0	0
		0.797907	-0.546671											0.797907	-0.546671
		0	0											0	0
		0.254637	0.095166											0.254637	0.095166
		0	0											0	0
		-0.0317831	0.0239909											-0.0317831	0.0239909
		0	0											0	0
		0.350112	0.197958											0.350112	0.197958
		0	0											0	0
		0.409608	0.403117											0.409608	0.403117
		0	0											0	0
		0.797907	-0.546671											0.797907	-0.546671
		0	0											0	0
		0.50904	0.81897											0.50904	0.81897
		0	0											0	0
		0.325876	0.649512											0.325876	0.649512
		0	0											0	0
		-0.11817	-0.0322292											-0.11817	-0.0322292
		0	0											0	0
		0.19879	0.0799369											0.19879	0.0799369
		0	0											0	0
		-0.115337	-0.0435891											-0.115337	-0.0435891
		0	0											0	0
		0.877147	0.354975											0.877147	0.354975
		0	0											0	0
		-0.105763	-0.0130582											-0.105763	-0.0130582
		0	0											0	0
		0.797907	-0.546671											0.797907	-0.546671
		0	0											0	0
		0.505501	0.0662637											0.505501	0.0662637
		0	0											0	0
		0.797907	-0.546671											0.797907	-0.546671
		0	0											0	0
		0.847394	0.46201											0.847394	0.46201
		0	0											0	0
		0.811227	-0.21494											0.811227	-0.21494
		0	0											0	0
		0.926998	0.203868											0.926998	0.203868
		0	0											0	0
		0.541361	0.710647											0.541361	0.710647
		0	0											0	0
		0.934008	0.27345											0.934008	0.27345
		0	0											0	0
		0.867427	-0.494611											0.867427	-0.494611
		0	0											0	0
		0.797907	-0.546671											0.797907	-0.546671
		0	0											0	0
		-0.0317831	0.0239909											-0.0317831	0.0239909
		0	0											0	0
		0.797907	-0.546671											0.797907	-0.546671
		0	0											0	0
		0.924298	0.01002											0.924298	0.01002
		0	0											0	0
		0.928638	0.356122											0.928638	0.356122
		0	0											0	0
		-0.102017	-0.0329688											-0.102017	-0.0329688
		0	0											0	0
		0.541361	0.710647											0.541361	0.710647

## Sheet: Sheet14
1	1	0	0	-1	1	-1.58544	-0.754932	-19.7644	19.7644	-0.732453	-0.502146	-9.1309	9.1309	0	0
		0.982124	-0.178672	1	1	-2.03142	-1.46184	19.7644	19.7644	-0.938493	-0.972346	9.1309	9.1309	0.982124	-0.178672
		0	0	1	-1	-1.75636	-0.715467	19.7644	-19.7644	-0.811416	-0.475896	9.1309	-9.1309	0	0
		0.112735	0.953965	-1	-1	-1.33569	-1.79401	-19.7644	-19.7644	-0.617071	-1.1933	-9.1309	-9.1309	0.112735	0.953965
		0	0			-1.55253	-0.964152			-0.71725	-0.64131			0	0
		0.982124	-0.178672			-1.61065	-1.52912			-0.744102	-1.0171			0.982124	-0.178672
		0	0			-1.97427	-1.12985			-0.912087	-0.751524			0	0
		-0.0133476	0.190564			-1.5761	-1.04504			-0.728139	-0.695113			-0.0133476	0.190564
		0	0			-1.80905	-0.667602			-0.835758	-0.444059			0	0
		0.112735	0.953965			-1.64448	-0.703333			-0.759729	-0.467825			0.112735	0.953965
		0	0			-1.55245	-1.34953			-0.717213	-0.897648			0	0
		-0.113361	-0.0769574			-1.41422	2.69922			-0.653353	1.7954			-0.113361	-0.0769574
		0	0			2.16066	12.699			0.998201	8.44677			0	0
		-0.0321046	0.415903			-1.14122	-0.904858			-0.527229	-0.60187			-0.0321046	0.415903
		0	0			18.8232	-2.37843			8.69609	-1.58203			0	0
		-0.0830864	-0.00736146											-0.0830864	-0.00736146
		0	0											0	0
		-0.10301	-0.084876											-0.10301	-0.084876
		0	0											0	0
		-0.166612	-0.192279											-0.166612	-0.192279
		0	0											0	0
		-0.158677	0.0289925											-0.158677	0.0289925
		0	0											0	0
		0.982124	-0.178672											0.982124	-0.178672
		0	0											0	0
		-0.0338234	0.0773042											-0.0338234	0.0773042
		0	0											0	0
		-0.0696911	-0.134769											-0.0696911	-0.134769
		0	0											0	0
		0.408958	-0.146585											0.408958	-0.146585
		0	0											0	0
		0.982124	-0.178672											0.982124	-0.178672
		0	0											0	0
		-0.113159	-0.182252											-0.113159	-0.182252
		0	0											0	0
		0.986856	-0.15228											0.986856	-0.15228
		0	0											0	0
		0.998145	0.0393568											0.998145	0.0393568
		0	0											0	0
		0.982124	-0.178672											0.982124	-0.178672
		0	0											0	0
		-0.182073	-0.193763											-0.182073	-0.193763
		0	0											0	0
		-0.161487	-0.108512											-0.161487	-0.108512
		0	0											0	0
		0.121828	0.988502											0.121828	0.988502
		0	0											0	0
		0.112735	0.953965											0.112735	0.953965
		0	0											0	0
		0.994201	0.0924689											0.994201	0.0924689
		0	0											0	0
		-0.105992	-0.109815											-0.105992	-0.109815
		0	0											0	0
		-0.105992	-0.109815											-0.105992	-0.109815
		0	0											0	0
		-0.0399183	-0.0595112											-0.0399183	-0.0595112
		0	0											0	0
		-0.120664	-0.1852											-0.120664	-0.1852
		0	0											0	0
		-0.138352	-0.059196											-0.138352	-0.059196
		0	0											0	0
		0.390368	0.883072											0.390368	0.883072
		0	0											0	0
		-0.0943893	-0.0501513											-0.0943893	-0.0501513
		0	0											0	0
		-0.107839	-0.108529											-0.107839	-0.108529
		0	0											0	0
		-0.0510657	-0.0884451											-0.0510657	-0.0884451
		0	0											0	0
		-0.12154	0.231867											-0.12154	0.231867
		0	0											0	0
		0.509952	0.824597											0.509952	0.824597
		0	0											0	0
		0.937709	0.329127											0.937709	0.329127
		0	0											0	0
		0.440291	0.861005											0.440291	0.861005
		0	0											0	0
		0.318038	0.878339											0.318038	0.878339
		0	0											0	0
		0.112735	0.953965											0.112735	0.953965
		0	0											0	0
		-0.247153	-0.133392											-0.247153	-0.133392
		0	0											0	0
		-0.0564731	0.348639											-0.0564731	0.348639
		0	0											0	0
		0.628651	-0.227985											0.628651	-0.227985
		0	0											0	0
		0.982124	-0.178672											0.982124	-0.178672
		0	0											0	0
		0.982124	-0.178672											0.982124	-0.178672
		0	0											0	0
		-0.104342	-0.121295											-0.104342	-0.121295
		0	0											0	0
		-0.0163459	0.441038											-0.0163459	0.441038
		0	0											0	0
		-0.0810051	-0.0724286											-0.0810051	-0.0724286
		0	0											0	0
		-0.0810051	-0.0724286											-0.0810051	-0.0724286
		0	0											0	0
		-0.0405183	0.518159											-0.0405183	0.518159
		0	0											0	0
		-0.0346745	-0.0611835											-0.0346745	-0.0611835
		0	0											0	0
		0.982124	-0.178672											0.982124	-0.178672
		0	0											0	0
		-0.10301	-0.084876											-0.10301	-0.084876
		0	0											0	0
		0.982124	-0.178672											0.982124	-0.178672
		0	0											0	0
		0.982124	-0.178672											0.982124	-0.178672
		0	0											0	0
		0.982124	-0.178672											0.982124	-0.178672
		0	0											0	0
		0.982124	-0.178672											0.982124	-0.178672
		0	0											0	0
		-0.0712391	-0.158235											-0.0712391	-0.158235
		0	0											0	0
		-0.150211	-0.197465											-0.150211	-0.197465
		0	0											0	0
		0.32455	0.907493											0.32455	0.907493
		0	0											0	0
		-0.26261	-0.187719											-0.26261	-0.187719
		0	0											0	0
		-0.0858027	-0.0528355											-0.0858027	-0.0528355
		0	0											0	0
		0.982124	-0.178672											0.982124	-0.178672
		0	0											0	0
		0.982124	-0.178672											0.982124	-0.178672
		0	0											0	0
		0.112735	0.953965											0.112735	0.953965
		0	0											0	0
		0.112735	0.953965											0.112735	0.953965
		0	0											0	0
		0.982124	-0.178672											0.982124	-0.178672
		0	0											0	0
		0.981414	0.177446											0.981414	0.177446
		0	0											0	0
		-0.10301	-0.084876											-0.10301	-0.084876
		0	0											0	0
		0.999074	0.0033252											0.999074	0.0033252
		0	0											0	0
		-0.0670196	-0.0435862											-0.0670196	-0.0435862
		0	0											0	0
		-0.180188	-0.135768											-0.180188	-0.135768
		0	0											0	0
		-0.0587114	0.330842											-0.0587114	0.330842
		0	0											0	0
		0.982124	-0.178672											0.982124	-0.178672
		0	0											0	0
		-0.0858027	-0.0528355											-0.0858027	-0.0528355
		0	0											0	0
		0.981414	0.177446											0.981414	0.177446
		0	0											0	0
		-0.0975011	-0.0608549											-0.0975011	-0.0608549
		0	0											0	0
		-0.0587114	0.330842											-0.0587114	0.330842
		0	0											0	0
		-0.0827222	-0.0567116											-0.0827222	-0.0567116
		0	0											0	0
		0.290364	-0.226947											0.290364	-0.226947
		0	0											0	0
		-0.0943893	-0.0501513											-0.0943893	-0.0501513
		0	0											0	0
		0.982124	-0.178672											0.982124	-0.178672
		0	0											0	0
		0.982124	-0.178672											0.982124	-0.178672
		0	0											0	0
		-0.105992	-0.109815											-0.105992	-0.109815

## Sheet: Sheet19
1	1	0	0	-1	1	8.04277	-1.77367	-8.44491	8.44491	5.72859	-1.3218	-6.01502	6.01502	0	0
		0.918291	-0.237863	1	1	-1.0343	-3.3755	8.44491	8.44491	-0.736698	-2.51555	6.01502	6.01502	0.918291	-0.237863
		0	0	1	-1	-1.08687	-1.64066	8.44491	-8.44491	-0.774138	-1.22268	6.01502	-6.01502	0	0
		0.857966	-0.0172824	-1	-1	-1.08422	4.94454	-8.44491	-8.44491	-0.772253	3.68486	-6.01502	-6.01502	0.857966	-0.0172824
		0	0			-0.952161	2.82631			-0.678192	2.10628			0	0
		0.916242	-0.211412			0.37995	2.88344			0.270625	2.14885			0.916242	-0.211412
		0	0			-1.75267	-0.860365			-1.24837	-0.641177			0	0
		0.0880629	0.227001			0.0623032	-0.830407			0.0443765	-0.618851			0.0880629	0.227001
		0	0			-3.45122	-3.78115			-2.45818	-2.81786			0	0
		-0.199667	-0.102551			0.103397	-0.297005			0.0736462	-0.22134			-0.199667	-0.102551
		0	0			0.773017	1.90445			0.550593	1.41927			0	0
		-0.0234799	0.568243											-0.0234799	0.568243
		0	0											0	0
		-0.337208	-0.581749											-0.337208	-0.581749
		0	0											0	0
		-0.160958	0.487879											-0.160958	0.487879
		0	0											0	0
		-0.123516	0.589363											-0.123516	0.589363
		0	0											0	0
		-0.0538061	0.685788											-0.0538061	0.685788
		0	0											0	0
		-0.232182	0.250981											-0.232182	0.250981
		0	0											0	0
		-0.457317	-0.459945											-0.457317	-0.459945
		0	0											0	0
		-0.117829	-0.402342											-0.117829	-0.402342
		0	0											0	0
		-0.117829	-0.402342											-0.117829	-0.402342
		0	0											0	0
		0.916242	-0.211412											0.916242	-0.211412
		0	0											0	0
		-0.048182	0.68967											-0.048182	0.68967
		0	0											0	0
		-0.209748	-0.419263											-0.209748	-0.419263
		0	0											0	0
		-0.393167	-0.450694											-0.393167	-0.450694
		0	0											0	0
		0.665088	-0.314375											0.665088	-0.314375
		0	0											0	0
		0.00709766	-0.0989802											0.00709766	-0.0989802
		0	0											0	0
		-0.29197	-0.0917282											-0.29197	-0.0917282
		0	0											0	0
		0.302236	-0.27777											0.302236	-0.27777
		0	0											0	0
		-0.123516	0.589363											-0.123516	0.589363
		0	0											0	0
		0.0996046	0.314772											0.0996046	0.314772
		0	0											0	0
		-0.450897	-0.418444											-0.450897	-0.418444
		0	0											0	0
		-0.108471	0.336882											-0.108471	0.336882
		0	0											0	0
		-0.108471	0.336882											-0.108471	0.336882
		0	0											0	0
		0.511787	-0.147294											0.511787	-0.147294
		0	0											0	0
		-0.393167	-0.450694											-0.393167	-0.450694
		0	0											0	0
		-0.199667	-0.102551											-0.199667	-0.102551
		0	0											0	0
		-0.165724	0.73014											-0.165724	0.73014
		0	0											0	0
		-0.0952321	0.770316											-0.0952321	0.770316
		0	0											0	0
		-0.370409	-0.73046											-0.370409	-0.73046
		0	0											0	0
		0.0117791	-0.0354015											0.0117791	-0.0354015
		0	0											0	0
		-0.199667	-0.102551											-0.199667	-0.102551
		0	0											0	0
		0.916242	-0.211412											0.916242	-0.211412
		0	0											0	0
		-0.115552	-0.329614											-0.115552	-0.329614
		0	0											0	0
		0.0117791	-0.0354015											0.0117791	-0.0354015
		0	0											0	0
		0.141822	-0.0655437											0.141822	-0.0655437
		0	0											0	0
		0.916242	-0.211412											0.916242	-0.211412
		0	0											0	0
		0.571955	0.376753											0.571955	0.376753
		0	0											0	0
		-0.393167	-0.450694											-0.393167	-0.450694
		0	0											0	0
		-0.117829	-0.402342											-0.117829	-0.402342

## Sheet: Sheet6
1	1	0	0	-1	1	2.26683	4.48943	-10.0467	10.0467	0.99121	2.32247	-4.39312	4.39312	0	0
		0.920484	-0.355304	1	1	0.341266	1.99486	10.0467	10.0467	0.149225	1.03198	4.39312	4.39312	0.920484	-0.355304
		0	0	1	-1	6.89662	6.84304	10.0467	-10.0467	3.01567	3.54004	4.39312	-4.39312	0	0
		0.742721	-0.656211	-1	-1	-1.9101	-0.440463	-10.0467	-10.0467	-0.835227	-0.22786	-4.39312	-4.39312	0.742721	-0.656211
		0	0			-1.87431	-0.420319			-0.819576	-0.217439			0	0
		0.231418	0.42062			-1.71736	0.0526937			-0.750947	0.0272595			0.231418	0.42062
		0	0			-1.90472	-0.43993			-0.832875	-0.227584			0	0
		0.742721	-0.656211			-1.86103	-0.784659			-0.813766	-0.40592			0.742721	-0.656211
		0	0			-1.90521	-0.429345			-0.833088	-0.222109			0	0
		0.742721	-0.656211			-1.5014	-0.760309			-0.656515	-0.393323			0.742721	-0.656211
		0	0			-1.40401	-1.34289			-0.613927	-0.694705			0	0
		0.742721	-0.656211			-1.88678	-0.47659			-0.825029	-0.24655			0.742721	-0.656211
		0	0			-1.58973	-0.123623			-0.695138	-0.0639529			0	0
		0.534924	-0.613489			-1.51838	-1.01624			-0.663937	-0.525721			0.534924	-0.613489
		0	0			9.56833	-7.14566			4.18392	-3.69659			0	0
		0.659061	0.516735											0.659061	0.516735
		0	0											0	0
		0.535335	0.628421											0.535335	0.628421
		0	0											0	0
		0.535335	0.628421											0.535335	0.628421
		0	0											0	0
		0.255578	0.505652											0.255578	0.505652
		0	0											0	0
		-0.191177	-0.172612											-0.191177	-0.172612
		0	0											0	0
		-0.529745	-0.0324467											-0.529745	-0.0324467
		0	0											0	0
		-0.222784	-0.100031											-0.222784	-0.100031
		0	0											0	0
		0.530556	0.736595											0.530556	0.736595
		0	0											0	0
		0.946427	-0.207738											0.946427	-0.207738
		0	0											0	0
		0.730831	-0.591857											0.730831	-0.591857
		0	0											0	0
		-0.0832629	-0.126897											-0.0832629	-0.126897
		0	0											0	0
		0.298322	0.471914											0.298322	0.471914
		0	0											0	0
		0.577904	0.217289											0.577904	0.217289
		0	0											0	0
		0.00544365	0.165333											0.00544365	0.165333
		0	0											0	0
		0.837392	0.272522											0.837392	0.272522
		0	0											0	0
		0.456426	0.650663											0.456426	0.650663
		0	0											0	0
		0.245274	-0.337255											0.245274	-0.337255
		0	0											0	0
		0.603518	0.686916											0.603518	0.686916
		0	0											0	0
		0.873985	-0.445013											0.873985	-0.445013
		0	0											0	0
		0.535335	0.628421											0.535335	0.628421
		0	0											0	0
		0.0412499	-0.159586											0.0412499	-0.159586
		0	0											0	0
		0.661332	0.554092											0.661332	0.554092
		0	0											0	0
		0.539144	0.753335											0.539144	0.753335
		0	0											0	0
		0.535335	0.628421											0.535335	0.628421
		0	0											0	0
		-0.178175	-0.147388											-0.178175	-0.147388
		0	0											0	0
		0.946701	-0.203843											0.946701	-0.203843
		0	0											0	0
		0.742721	-0.656211											0.742721	-0.656211

[truncated: 16 more sheets: Sheet13, Sheet7, Sheet17, Sheet20, Sheet23, Sheet11, Sheet22, Sheet26, Sheet29, Sheet32, Sheet24, Sheet27, Sheet30, Sheet33, Sheet2, Table S5 F4b]
